# Supplementary material
Source: PubMed Central journal article supplement (PMC3309349)

Genomic alignment visualization showing sequence identity and translation for various *aclA* genes across different species. The top part shows a consensus sequence from position 1 to 340. Below, individual gene entries are listed with their accession numbers and species names. Each entry includes the DNA sequence, the translated protein sequence (with amino acid single-letter codes), and a yellow arrow indicating the protein's length. Key proteins identified include ATP citrate lyase, alpha subunit and putative citryl-CoA synthetase large subunit. The alignment is color-coded to show conserved regions across the different sequences.



Genomic map showing gene models for aconitate hydratase/aconitase A across various species and contigs. The map includes coordinates (1-340, 350-680, 690-1020, 1030-1360, 1370-1700, 1710-1923) and sequence alignments for each gene. Species include acnA - Rfp1S1ym\_bt00040, acnA - Rfp2S1ym\_aa00030, acnA - TevjS1ym\_az00150, and acnA - Cand. E. persephone DQ780135. The gene models are color-coded and labeled as 'aconitate hydratase/aconitase A'.

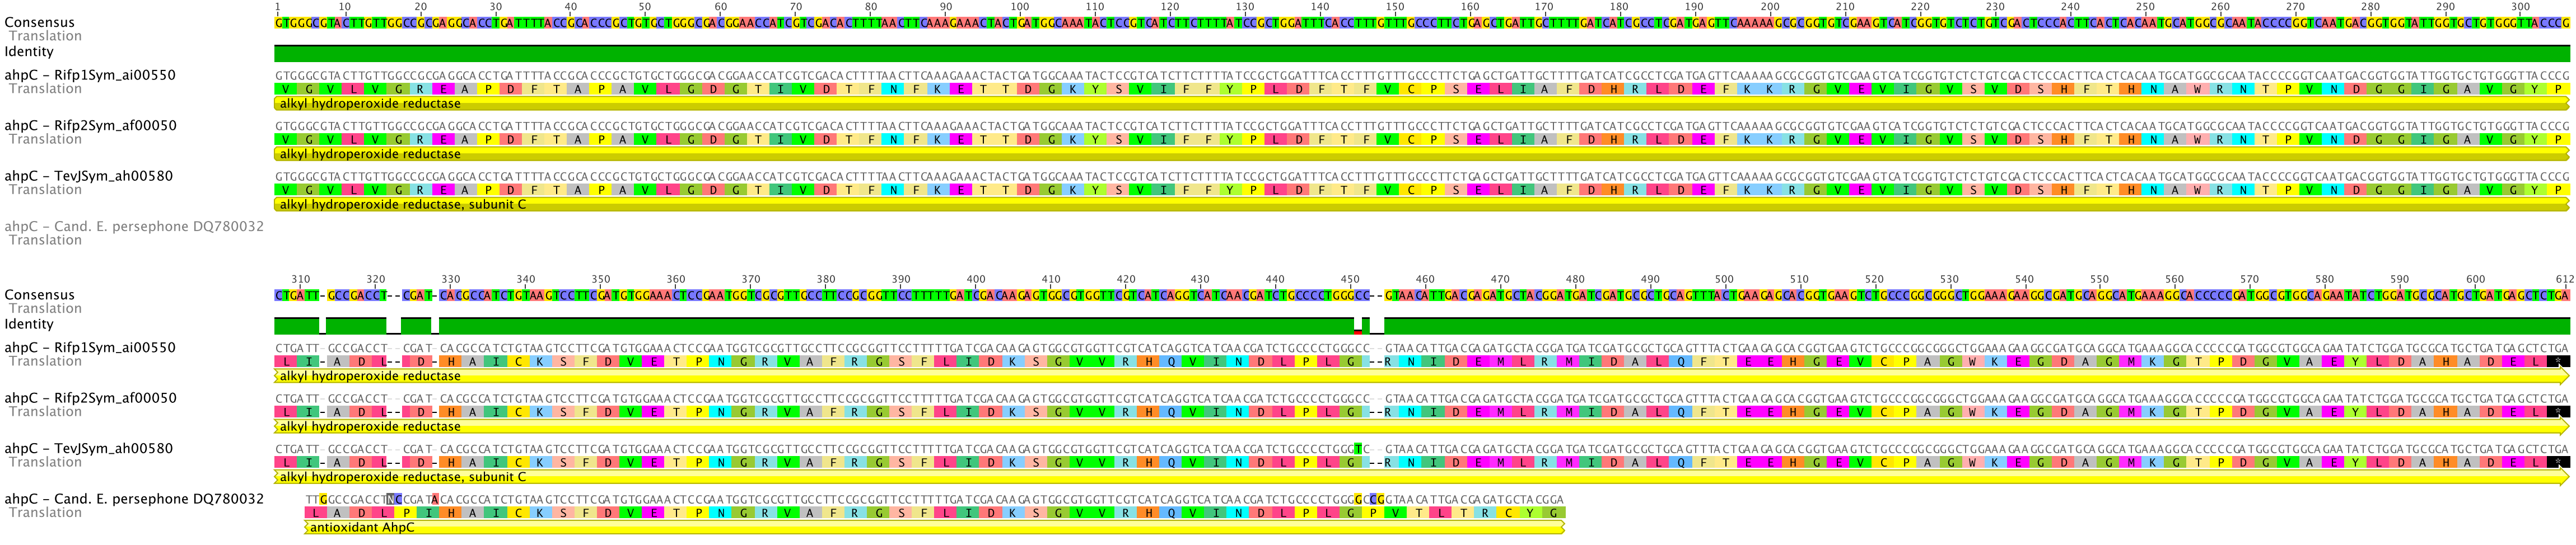



Genomic map showing the structure of the aprA gene across various strains. The map includes DNA sequence coordinates (1-330 and 340-660), protein translations, and consensus sequences. Key features include the adenylylsulfate reductase, alpha subunit and adenylylsulfate reductase, alpha subunit CDS. Strains shown include aprA - Rfp1Symb\_ej00110, aprA - Rfp2Symb\_bz00020, aprA - TevjSymb\_ag00880, aprA - Cand. E. persephone DQ780257, and aprA - Cand. E. persephone DQ780256.

Consensus  
Translation  
Identity

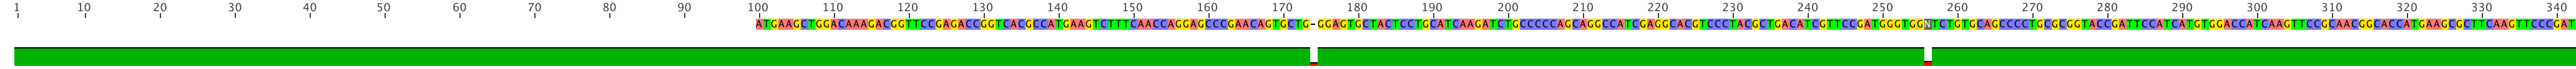

aprB - Rifp1Sym\_ej00100  
Translation  
ATGAAGCTGGACAAAGACGGTCCGAGACCGGTCACGCCATGAAGTCTTTCAACCAGGAGCCCGAACAGTGGCTG-GGAGTGCTACTCCTGCATCAAGATCTGCCCCAGCAGGCCATCGAGGCACGTCCCTACGCTGACATCGTCCGATGGGTGG-TCTGTGCAGCCCTGCGCGGTACCGATTCCATCATGTGGACCATCAAGTTCCGCAACGGCACCATGAAGCGCTTCAAGTTCCCGAT  
V Q P L R G T D S I M W T I K F R N G T M K R F K F P I  
adenylylsulfate reductase, beta subunit

aprB - Rifp2Sym\_bz00040  
Translation  
ATGAAGCTGGACAAAGACGGTCCGAGACCGGTCACGCCATGAAGTCTTTCAACCAGGAGCCCGAACAGTGGCTG-GGAGTGCTACTCCTGCATCAAGATCTGCCCCAGCAGGCCATCGAGGCACGTCCCTACGCTGACATCGTCCGATGGGTGG-TCTGTGCAGCCCTGCGCGGTACCGATTCCATCATGTGGACCATCAAGTTCCGCAACGGCACCATGAAGCGCTTCAAGTTCCCGAT  
M K L D K D G S E T G H A M K S F N Q E P E Q C W- E C Y S C I K I C P Q Q A I E A R P Y A D I V P M G G S V Q P L R G T D S I M W T I K F R N G T M K R F K F P I  
adenylylsulfate reductase, beta subunit

aprB - TevJSym\_ag00890  
Translation  
ATGAAGCTGGACAAAGACGGTCCGAGACCGGTCACGCCATGAAGTCTTTCAACCAGGAGCCCGAACAGTGGCTG-GGAGTGCTACTCCTGCATCAAGATCTGCCCCAGCAGGCCATCGAGGCACGTCCCTACGCTGACATCGTCCGATGGGTGG-TCTGTGCAGCCCTGCGCGGTACCGATTCCATCATGTGGACCATCAAGTTCCGCAACGGCACCATGAAGCGCTTCAAGTTCCCGAT  
M K L D K D G S E T G H A M K S F N Q E P E Q C W- E C Y S C I K I C P Q Q A I E A R P Y A D I V P M G G S V Q P L R G T D S I M W T I K F R N G T M K R F K F P I  
adenylylsulfate reductase, beta subunit

aprB - Cand. E. persephone DQ780034  
Translation  
GAGAAAAGCAACATGCGCAACATTTGTGCGTACTGAAAAGTGTGATGGCTGCAAGGGTCAGGACAGGACCGCTTGCATGTACACTGCCCCGATGACCTCATGAAGCTGGACAAAGACGGTCCGAGACCGGTCACGCCATGAAGTCTTTCAACCAGGAGCCCGAACAGTGGCTGGGAGTGCTACTCCTGCATCAAGATCTGCCCCAGCAGGCCATCGAGGCACGTCCCTACGC  
E K C T M P T F V R T E K C D G C K G Q D R T A C M Y I C P H D L M K L D K D G S E T G H A M K S F N Q E P E Q C W G V L L L H Q D L P P A G H R G T S L R  
APS reductase beta subunit

aprB - Cand. E. persephone DQ780033  
Translation  
AGTCTTTCAACCAGGAGCCCGAACAGTGGCTGGGAGTGCTACTCCTGCATCAAGATCTGCCCCAGCAGGCCATCGAGGCACGTCCCTACGCTGACATCGTCCGATGGGTGG-TCTGTGCAGCCCTGCGCGGTACCGATTCCATCATGTGGACCATCAAGTTCCGCAACGGCACCATGAAGCGCTTCAAGTTCCCGAT  
S L S T R S P N S A G E C Y S C I K I C P Q Q A I E A R P Y A D I V P M G G S V Q P L R G T D S I M W T I K F R N G T M K R F K F P I  
APS reductase beta subunit

Consensus  
Translation  
Identity

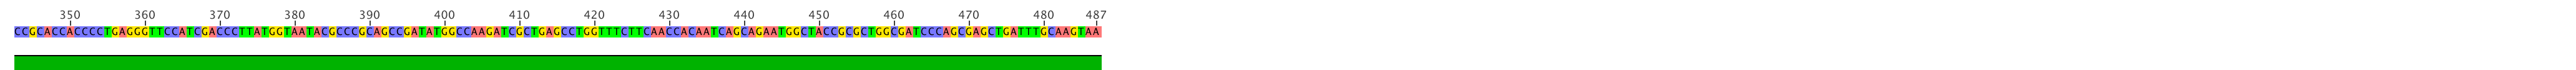

aprB - Rifp1Sym\_ej00100  
Translation  
CCGCACCACCCCTGAGGGTCCCATCGACCCCTATGGTAATACGCCCGCAGCCGATATGGCCAAGATCGCTGAGCCTGGTTTCTTCAACCACAATCAGCAGAATGGCTACCGCGCTGGCGATCCCAGCGAGCTGATTTGCAAGTAA  
R T T P E G S I D P Y G N T P A A D M A K I A E P G F F N H N Q Q N G Y R A G D P S E L I C K  
adenylylsulfate reductase, beta subunit

aprB - Rifp2Sym\_bz00040  
Translation  
CCGCACCACCCCTGAGGGTCCCATCGACCCCTATGGTAATACGCCCGCAGCCGATATGGCCAAGATCGCTGAGCCTGGTTTCTTCAACCACAATCAGCAGAATGGCTACCGCGCTGGCGATCCCAGCGAGCTGATTTGCAAGTAA  
R T T P E G S I D P Y G N T P A A D M A K I A E P G F F N H N Q Q N G Y R A G D P S E L I C K  
adenylylsulfate reductase, beta subunit

aprB - TevJSym\_ag00890  
Translation  
CCGCACCACCCCTGAGGGTCCCATCGACCCCTATGGTAATACGCCCGCAGCCGATATGGCCAAGATCGCTGAGCCTGGTTTCTTCAACCACAATCAGCAGAATGGCTACCGCGCTGGCGATCCCAGCGAGCTGATTTGCAAGTAA  
R T T P E G S I D P Y G N T P A A D M A K I A E P G F F N H N Q Q N G Y R A G D P S E L I C K  
adenylylsulfate reductase, beta subunit

aprB - Cand. E. persephone DQ780034  
Translation

aprB - Cand. E. persephone DQ780033  
Translation  
CCGCACCACCCCTGAGGGTCCCATCGACCCCTATGGTAATACGCCCGCAGCCGATATGGCCAAGATCGCTGAGCCTGGTTTCTTCAACCACAATCAGCAGAATGGCTACCGCGCTGGCGATCCCAGCGAGCTGATTTGCAAG  
R T T P E G S I D P Y G N T P A A D M A K I A E P G F F N H N Q Q N G Y R A G D P S E L I C K  
APS reductase beta subunit

Genomic alignment visualization showing consensus, translation, and identity for various protein variants (cbbM - Rfp1S1ym\_at00130, cbbM - Rfp2S1ym\_bi00210, cbbM - Tev1S1ym\_aj00630, cbbM - Cand. E. persephone DQ780068, cbbM - Cand. E. persephone DQ780046) across a range of amino acid positions (1-730, 740-1,090, 1,100-1,464). The visualization includes DNA sequence, protein translation, and identity bars. Key protein names like ribulose-1,5-bisphosphate carboxylase/oxygenase and ribulose bisphosphate carboxylase are highlighted.

Genomic alignment and translation of dsrA gene variants. The image displays DNA sequences, protein translations, and protein identities for various dsrA variants. Consensus sequences are shown at the top of each section. Variants include dsrA - Rifp1Sym\_am00340, dsrA - Rifp2Sym\_aa00430, dsrA - TevJSym\_aw00210, and dsrA - Cand. E. persephone DQ780148/DQ780147. Protein identities such as 'sulfite reductase, dissimilatory-type subunit alpha' and 'dissimilatory sulfite reductase, alpha subunit' are provided for each variant. The alignment shows high sequence conservation across the variants, with some partial sequences indicated by arrows.



Consensus  
Translation  
Identity

1 10 20 30 40 50 60 70 80 90 100 110 120 130 140 150 160 170 180 190 200 210 220 230 240 250 260 270 280 290 300 310 320 330 340 350

TTGCACCCCGTCTCAAGAAGAACTATGGCGCCTGGAGCTGGCATGATCGCCCGCGTCCCGGTGTGCTGCATCACGTTGCCAAGAGCGGTGACGAAATCTGGACCGTTCGCGCCGGTACCCAGCGTCAGATGGATCTCTTTACCATCCGCTCTGCTGATGGATATCGCCGATGAATTTGCTGAAGGCTATGTGCGCTTCACCAATTCGCTCCAACATCGAGTTTCATGGTGAGTGAGGAGTCCAAGGTTCAAGCCCTGATTGACAAGCTGACCGAGCATGGCTTCCCGATCGGTGGTACCGGCAAC

dsrB - Rifp1Sym\_am00350  
Translation  
sulfitreductase, dissimilatory-type subunit beta

dsrB - Rifp2Sym\_aa00410  
Translation  
sulfitreductase, dissimilatory-type subunit beta

dsrB - TevJSym\_aw00190  
Translation  
dissimilatory sulfite reductase, beta subunit

Consensus  
Translation  
Identity

360 370 380 390 400 410 420 430 440 450 460 470 480 490 500 510 520 530 540 550 560 570 580 590 600 610 620 630 640 650 660 670 680 690 700 710

TCCGGTCTCCATGATCTCTCACACCCAGGGCTGGTTGCACTGTGACATCCCCGGTACTGATGCGTCCGGCGCCGTGAAGGCCCTGATGGACGAGCTGATTGAGGAATACACCAAGGAAGAGATGCCGAACCGGGTTCGCATGACCCATCTCTGCTGCCAGATCAACTGCCGGTGGTCAGGGTGATATCGCGATCAACATTCAGCACACCAAGCCACCGCGGATCGACCACGACCAAGTGCCAAACGCTCTGCGAGCGTCCACCGTGGTGGCCCGCTGTCCGGTGGCCGCTATCCGTCTCGGATGGTCAACGGTAAAGCCCTCCCTGGAGATCGACGAGAAGAAGTGCATCTGCTGCGGT

dsrB - Rifp1Sym\_am00350  
Translation  
sulfitreductase, dissimilatory-type subunit beta

dsrB - Rifp2Sym\_aa00410  
Translation  
sulfitreductase, dissimilatory-type subunit beta

dsrB - TevJSym\_aw00190  
Translation  
dissimilatory sulfite reductase, beta subunit

Consensus  
Translation  
Identity

720 730 740 750 760 770 780 790 800 810 820 830 840 850 860 870 880 890 900 910 920 930 940 950 960 970 980 990 1,000 1,010 1,020 1,030 1,040 1,050 1,060 1,071

GCCTGCTTCCGCTTGTCCGCGGATGCAGATCAACGATCCTGAGCACTCAAAGTTCGGATCTGGGTGGTGGCAAGAAGTCCAACGCCCGCTCCAAGCCGACCTCCACAAGCTGGTTGCGGCAGGCATCCCCAACAAATCCGCGCGTGGCCCGAGGTCTCTGCGGTGCTCAAGCAGATCCTCAATGCCTATAAGGAAGATGCCAAGGATTGGGAACGCATCGGTGAGTGGGCTGAGCGTATCGGCTGGTCTCGCTCTTTGAGAAGACCGGTCTGCGGTTCAACAAGTATCACATCGATAACTGGCGTGGCGGTCTGTTGCAACCTGAACGCTCTGCTCACATCCGTTTCTAA

dsrB - Rifp1Sym\_am00350  
Translation  
sulfitreductase, dissimilatory-type subunit beta

dsrB - Rifp2Sym\_aa00410  
Translation  
sulfitreductase, dissimilatory-type subunit beta

dsrB - TevJSym\_aw00190  
Translation  
dissimilatory sulfite reductase, beta subunit

Genomic alignment visualization showing consensus sequences and translations for the *gapA* gene across four different strains: *Rifp1Sym\_dp00070*, *Rifp2Sym\_ar00120*, *TeVJSym\_an00400*, and *Cand. E. persephone DQ780188*. The alignment is presented in two segments, with the first segment covering positions 1 to 380 and the second segment covering positions 390 to 1139. Each segment displays the DNA consensus sequence, the corresponding amino acid translation, and a green bar representing the identity of the sequences. The protein is identified as **glyceraldehyde-3-phosphate dehydrogenase**. The alignment shows high sequence conservation across all strains, with the *Cand. E. persephone DQ780188* strain exhibiting a distinct insertion of approximately 100 amino acids between positions 810 and 910. The protein ends with a stop codon (marked with an asterisk) at position 1139.

Genomic map showing consensus, translation, and identity for isocitrate dehydrogenase (NADP) and isocitrate dehydrogenase (NADP-dependent monomeric-type) across various species and regions. The map includes coordinates (1-370, 380-740, 750-1110, 1120-1480, 1490-1860, 1870-2320) and sequence alignments for each variant.

Genomic alignment visualization showing consensus sequences, translations, and identities for various genes across different strains. The top section (residues 1-210) includes:

- Consensus Translation Identity
- korA1 - Rifp1Sym\_dm00080 Translation
- korA1 - Rif2Sym\_br00160 Translation
- korA1 - TevJSym\_az00290 Translation

The middle section (residues 220-690) includes:

- porA - Cand. E. persephone DQ780126 Translation
- porA - Cand. E. persephone DQ780069 Translation
- korA1 - Rifp1Sym\_dm00080 Translation
- korA1 - Rif2Sym\_br00160 Translation
- korA1 - TevJSym\_az00290 Translation
- porA - Cand. E. persephone DQ780126 Translation
- porA - Cand. E. persephone DQ780069 Translation

The bottom section (residues 700-1386) includes:

- Consensus Translation Identity
- korA1 - Rifp1Sym\_dm00080 Translation
- korA1 - Rif2Sym\_br00160 Translation
- korA1 - TevJSym\_az00290 Translation
- porA - Cand. E. persephone DQ780126 Translation
- porA - Cand. E. persephone DQ780069 Translation
- porA - Cand. E. persephone DQ780126 Translation
- porA - Cand. E. persephone DQ780069 Translation

Annotations include gene names (e.g., 2-oxoglutarate oxidoreductase, alpha subunit; 2-oxoglutarate synthase subunit korA; pyruvate:flavodoxin/ferredoxin oxidoreductase N-terminal) and alignment markers (arrows) indicating sequence matches and gaps.



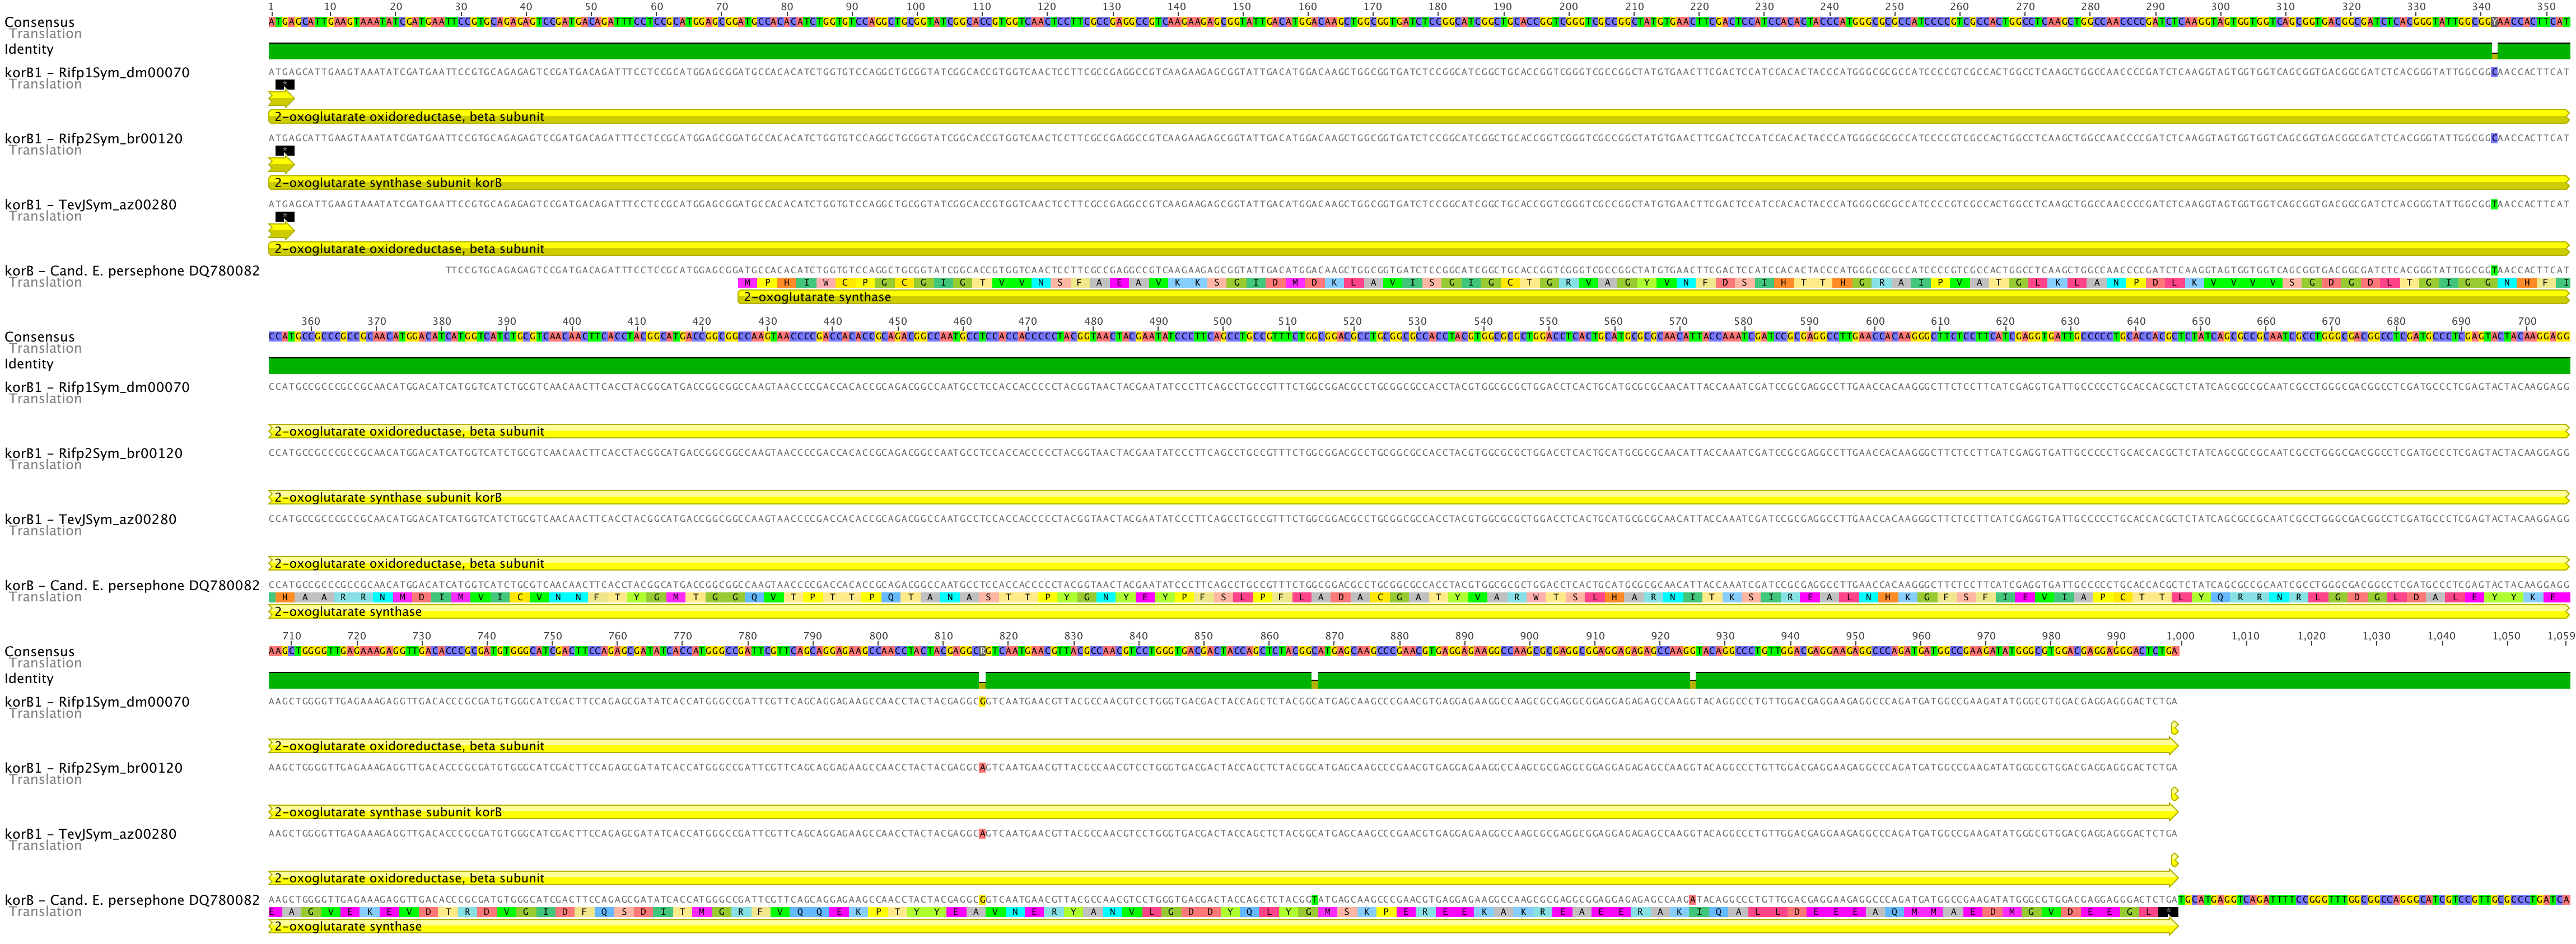

Consensus  
Translation  
Identity

1 10 20 30 40 50 60 70 80 90 100 110 120 130 140 150 160 170 180 190 200 210 220 230 240 250 261  
ATGGCATT CGGCAAAATCAAAGAGATCA CCGGC GTTGTCA CCA TCAA CAAGTCTTGGTGCAAGGGA TCGGGCTTCTGCGTCAATTA TTGCCCGA CCGA TGCCCTCGCCA TGTCA TCTGAA TA TAA CGCCAA GGA TA TCA TCCCCCGTT CGTCAAATCGCCGGA TGA TTGCA GGAA TTGTGA TTTCTGCCA GACGA TCTGTCCGGAA TTCGCCA TTTACGTCA CCCGCAAGGC GGAA CAAGA GGAGAA TGAGAA TCGGTAA

korD1 - Rifp1Sym\_dm00090  
Translation  
M A F G K I K E I T G V V T I N K S W C K G C G F C V N Y C P T D A L A M S S E Y N A K G Y H P P F V K S P D D C R N C D F C Q T I C P E F A I Y V T R K A E Q E E N E N A \*  
2-oxoglutarate oxidoreductase, delta subunit, putative

korD1 - Rifp2Sym\_br00140  
Translation  
M A F G K I K E I T G V V T I N K S W C K G C G F C V N Y C P T D A L A M S S E Y N A K G Y H P P F V K S P D D C R N C D F C Q T I C P E F A I Y V T R K A E Q E E N E M R  
2-oxoglutarate oxidoreductase, delta subunit, putative

korD1 - TevJSym\_az00300  
Translation  
M A F G K I K E I T G V V T I N K S W C K G C G F C V N Y C P T D A L A M S S E Y N A K G Y H P P F V K S P D D C R N C D F C Q T I C P E F A I Y V T R K A E Q E E N E M R  
2-oxoglutarate oxidoreductase, delta subunit

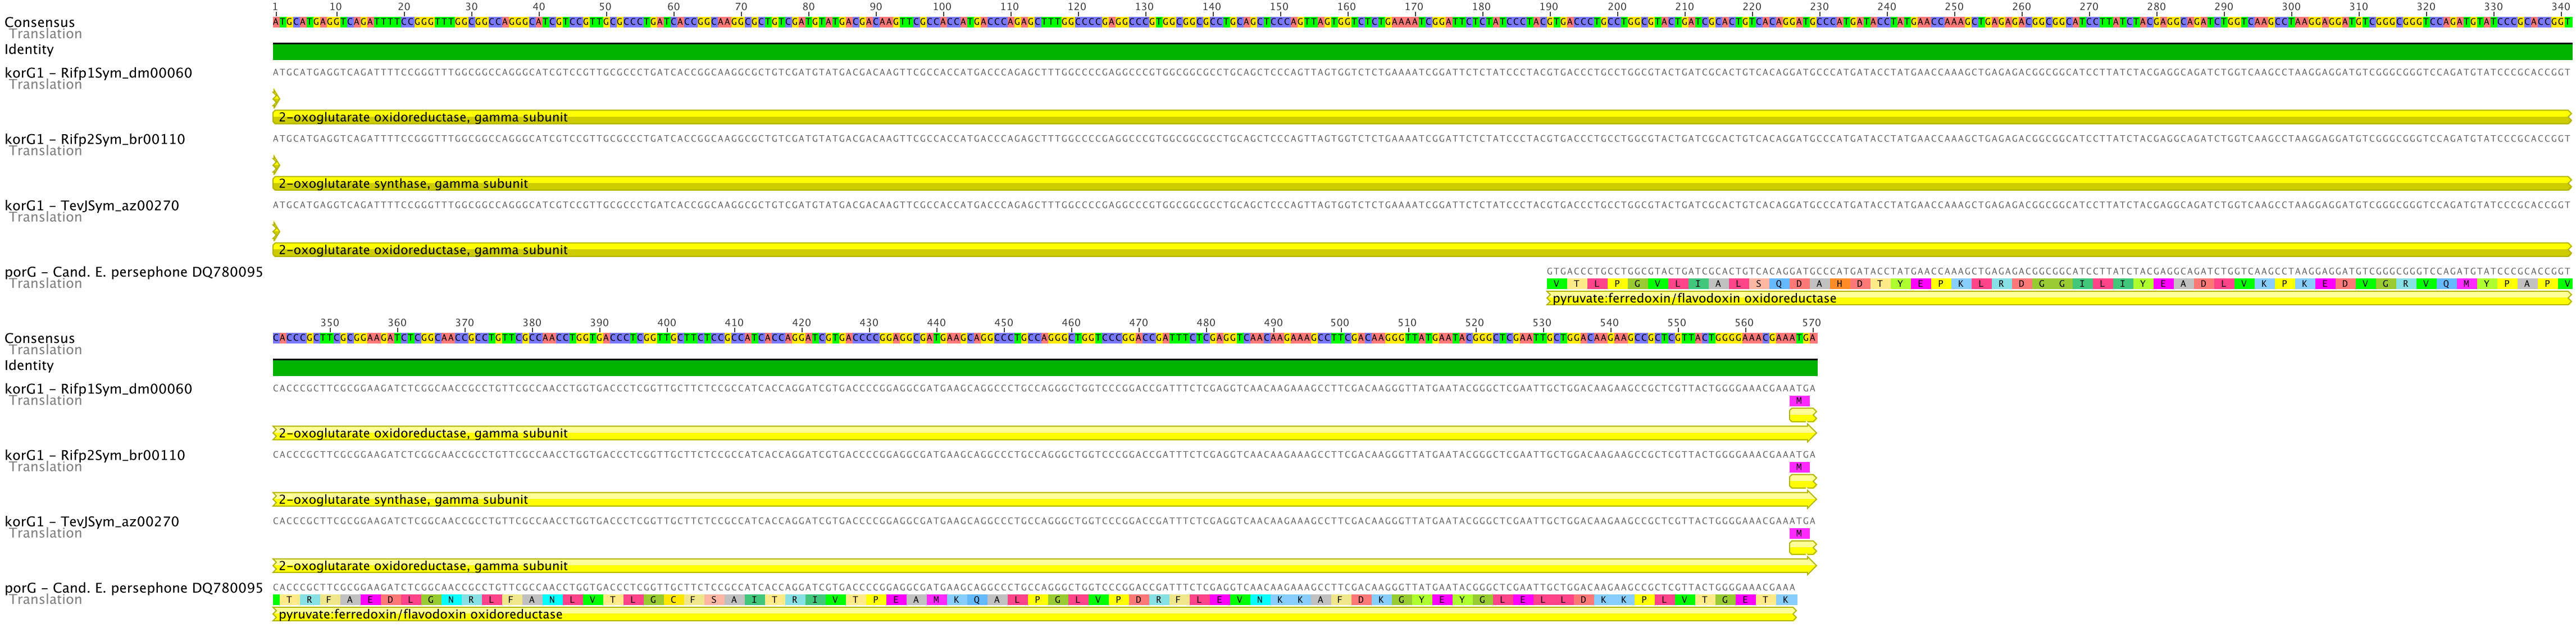

Consensus Translation Identity  
1 10 20 30 40 50 60 70 80 90 100 110 120 130 140 150 160 170 180 190 200 210 220 230 240 250 260  
GTGGAA TC GA TC CC CAC CCT G CA TCC CG GT G GAA A GAA T T T T GA G GAA GA TAA GAT GAA GA TA CGT GC G CAA A T T G C CA T G G T C C T G A A C C T G G A C A A G T G C A T C G G C T G C C A C A C T G T T C G G T G A C C T G C A A A A A T A T C T G G A C C A A C C G A A A G G G T G T G G A G T A C G C C T G G T C A A T A A T G T A G A G A G T A A A C C C G G C A T T G G T T C C C T A A G A A C T G G A A G A T C A G G A A A T G G A A G G C G G C T G G G T T A A G A A A A T G G C A A

narH - Rifp1S1ym\_ak00450 Translation  
respiratory nitrate reductase 1 beta chain

narH - Rifp2S1ym\_bt00090 Translation  
respiratory nitrate reductase 1 beta chain

narH - TevjS1ym\_ag00790 Translation  
respiratory nitrate reductase beta chain

narH - Cand. E. persephone NZ\_AASF01001412 Translation

Consensus Translation Identity  
270 280 290 300 310 320 330 340 350 360 370 380 390 400 410 420 430 440 450 460 470 480 490 500 510 520 530  
GCT GGA GCTCAA GGCCGGTGGTCGTA TCAGCAA GCTGCTGAACTCTTTGCGAA CCGTGA CATGCTGAGATCGACGACTACTACGAGCCGTTGATTA CGATTAACGCGAAATTGCA GAA CAA GCCCTCTGCTCA GAGCGGCCCACTGCA CGCCGCTCTCCAGATCA CCGCTGACGGGATGGA GAA GATCCA TTGGGGCCCTAAC TGGGAA GATGATCTGGCCGGCCGCTTGAAGATCGTTCAAAGGA CAA GAACTTCGAGGGCA

narH - Rifp1S1ym\_ak00450 Translation  
respiratory nitrate reductase 1 beta chain

narH - Rifp2S1ym\_bt00090 Translation  
respiratory nitrate reductase 1 beta chain

narH - TevjS1ym\_ag00790 Translation  
respiratory nitrate reductase beta chain

narH - Cand. E. persephone NZ\_AASF01001412 Translation

Consensus Translation Identity  
540 550 560 570 580 590 600 610 620 630 640 650 660 670 680 690 700 710 720 730 740 750 760 770 780 790 800  
TCCAGAA GCA GATGTA CAA GGAGTTTGA AAAA CTTTCCACATGTA CCTGCGCCGCTTGCA ACCATG CCGTGAATCCGGCGTGTGTCG CCA GTTGCCTTGGCGCCATCTACA ACGGTGACGAGGA CGGCGCGGTA CTAATCGA TCAGGATCGCTGCCGAGGCTGGCGGATGCGGTCA GTGCGCTGCCATAA GAA GATCTA TTCAA CTGGGAGCTGGCAAGTCGATCCTCTGCTATCCGCGCATCGAGTCT

narH - Rifp1S1ym\_ak00450 Translation  
respiratory nitrate reductase 1 beta chain

narH - Rifp2S1ym\_bt00090 Translation  
respiratory nitrate reductase 1 beta chain

narH - TevjS1ym\_ag00790 Translation  
respiratory nitrate reductase beta chain

narH - Cand. E. persephone NZ\_AASF01001412 Translation

Consensus Translation Identity  
810 820 830 840 850 860 870 880 890 900 910 920 930 940 950 960 970 980 990 1,000 1,010 1,020 1,030 1,040 1,050 1,060 1,070  
GGCATGCTTACCGCTTGGCCGATCGCTCTGTGGCCGATCCGTTATGGCCGGTGGCTTACGATGCTGACAA GATGACCGATGGCGGGGCACTGCAATGAGAA GAA CCGTATCAGTGGCAGCTGACATGTTCCCTGCA CCCCAGATCCGGCCGCTATTA GGCAGGCGCTGGAA GATGGCATTCGGCAACA TGGTTGGATGGGCTAAA GATCCCCAGTCTACAAGATGGCCATGGAGTGGAA GATGCCCTTCCGAT

narH - Rifp1S1ym\_ak00450 Translation  
respiratory nitrate reductase 1 beta chain

narH - Rifp2S1ym\_bt00090 Translation  
respiratory nitrate reductase 1 beta chain

narH - TevjS1ym\_ag00790 Translation  
respiratory nitrate reductase beta chain

narH - Cand. E. persephone NZ\_AASF01001412 Translation

Consensus Translation Identity  
1,080 1,090 1,100 1,110 1,120 1,130 1,140 1,150 1,160 1,170 1,180 1,190 1,200 1,210 1,220 1,230 1,240 1,250 1,260 1,270 1,280 1,290 1,300 1,310 1,320 1,330 1,340  
CCA TCC TGAGTTCGCA CCGTCCGCA TGA TGTGGTACGTGCCGCGTGTGCGCCGTCGACAGTCA GATCGATCAGGGCAA GCTGCCACCGAA CGGATGGCGGATCCG-AA GTCGCA GCGCTGGCGTTCCCGTACCGCTAT-CTGGCCAA CCGTGTGACCGCTGGTGA TGA GGCAGCGATCCCTCA GTGCCCTCAA--CAGAATGCTGGCGATCGCGAGCAA TCAGCGCTCAA GTCGA TTGAA GGCAAGCCGAA TGTTCGGCA

narH - Rifp1S1ym\_ak00450 Translation  
respiratory nitrate reductase 1 beta chain

narH - Rifp2S1ym\_bt00090 Translation  
respiratory nitrate reductase 1 beta chain

narH - TevjS1ym\_ag00790 Translation  
respiratory nitrate reductase beta chain

narH - Cand. E. persephone NZ\_AASF01001412 Translation

Consensus Translation Identity  
1,350 1,360 1,370 1,380 1,390 1,400 1,410 1,420 1,430 1,440 1,450 1,460 1,470 1,480 1,490 1,500 1,510 1,520 1,530 1,540 1,550 1,560 1,570 1,580 1,590 1,600 1,612  
CTGGAA TCTGTCGGGTTGA CTGA ACTGACGGCCGAGGAGATGTA CCA GATGCTCGGTATCGCCAACTA CGAGGA TCGCTCTGTTATCCCGACCGCCATGA GGAGA TGGTGCAGGAA GATCCCTATGCCTTCAGGGTCA GAA CCGATTTGGGCTGGCAA TACA GTTCA CCGTAGCGAGGCCGTCAGGGCTTACCCTGTTCCCGAGTCCCGGTAA ACGCA CCA TA CCCCGCA GGGCA TTAGCCCGCAA GAAGGGCTAA

narH - Rifp1S1ym\_ak00450 Translation  
respiratory nitrate reductase 1 beta chain

narH - Rifp2S1ym\_bt00090 Translation  
respiratory nitrate reductase 1 beta chain

narH - TevjS1ym\_ag00790 Translation  
respiratory nitrate reductase beta chain

narH - Cand. E. persephone NZ\_AASF01001412 Translation



1 10 20 30 40 50 60 70 80 90 100 110 120 130 140 150 160 170 180 190 200 210 220 230 240 250 260 270 280

Consensus  
Translation  
Identity

narI - Rifp1Sym\_ak00430  
Translation  
respiratory nitrate reductase 1 gamma chain

narI - Rifp2Sym\_bt00110  
Translation  
respiratory nitrate reductase 1 gamma chain

narI - TevJSym\_ag00770  
Translation  
respiratory nitrate reductase gamma chain

narI - Cand. E. persephone NZ\_AASF01002040  
Translation

misc

290 300 310 320 330 340 350 360 370 380 390 400 410 420 430 440 450 460 470 480 490 500 510 520 530 540 550 560 570

Consensus  
Translation  
Identity

narI - Rifp1Sym\_ak00430  
Translation  
respiratory nitrate reductase 1 gamma chain

narI - Rifp2Sym\_bt00110  
Translation  
respiratory nitrate reductase 1 gamma chain

narI - TevJSym\_ag00770  
Translation  
respiratory nitrate reductase gamma chain

narI - Cand. E. persephone NZ\_AASF01002040  
Translation

misc

580 590 600 610 620 630 640 650 660 670 680 690 700 710 720 730 740 750 760 770 780 790 800 810 820 830 840 850 860

Consensus  
Translation  
Identity

narI - Rifp1Sym\_ak00430  
Translation  
respiratory nitrate reductase 1 gamma chain

narI - Rifp2Sym\_bt00110  
Translation  
respiratory nitrate reductase 1 gamma chain

narI - TevJSym\_ag00770  
Translation  
respiratory nitrate reductase gamma chain

narI - Cand. E. persephone NZ\_AASF01002040  
Translation  
hypothetical protein

misc

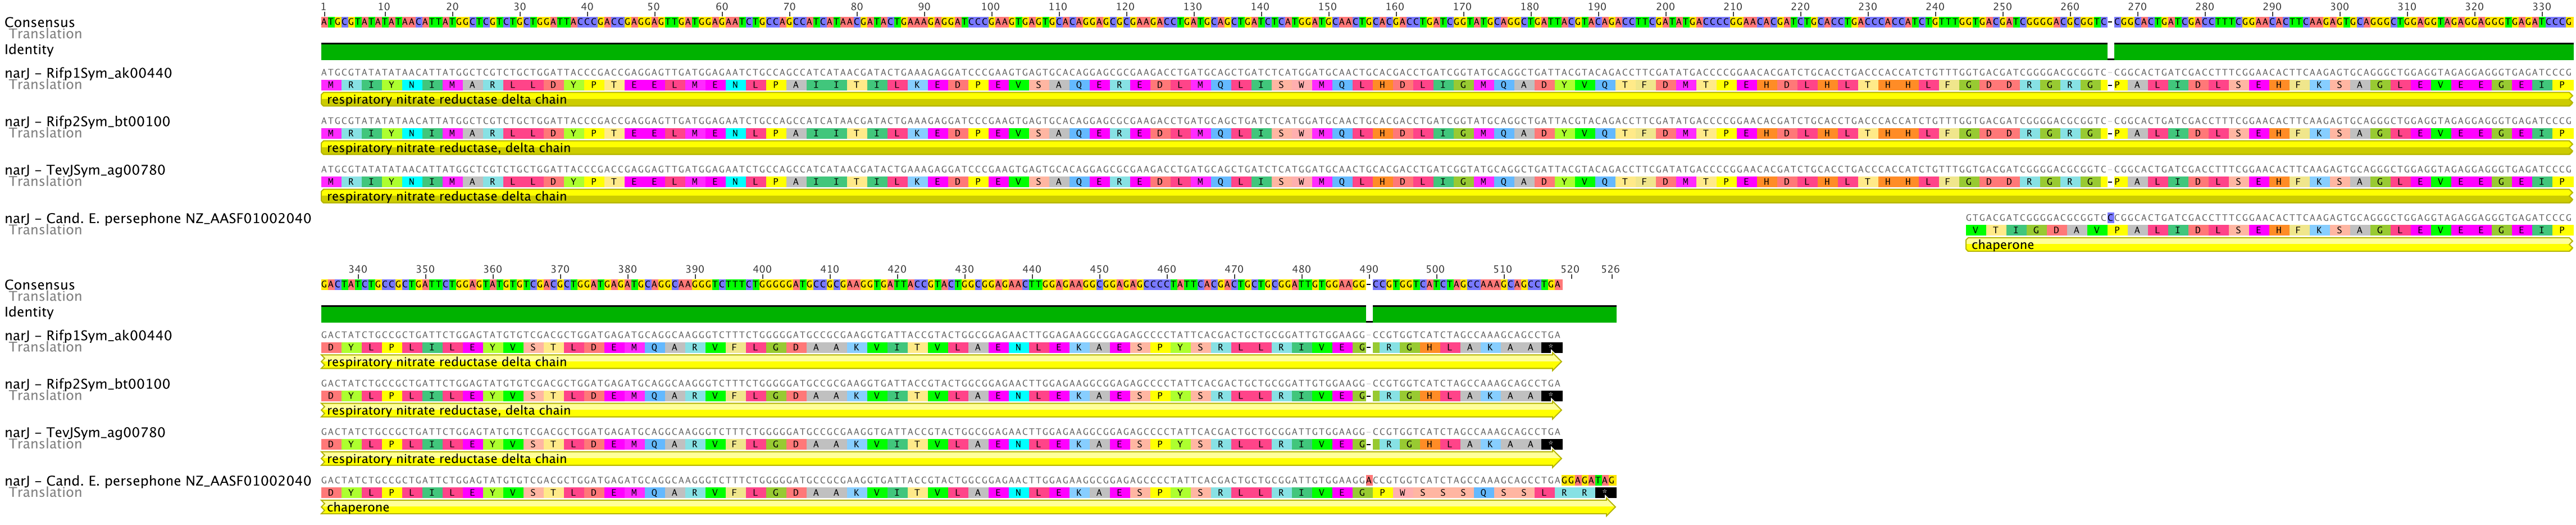

Genomic map showing consensus sequences, translations, and identities for various genes (nosZ) across a range of positions (1 to 280). The map includes multiple entries for nosZ from different sources (e.g., nosZ - Rifp1Sym\_ag00460, nosZ - Rifp2Sym\_au00130, nosZ - TevjSym\_ac00130) and their corresponding protein products (nitrous-oxide reductase). Consensus sequences are shown in green, and translations are shown in yellow. The map is divided into segments of 100 positions each, with positions 1, 10, 20, 30, 40, 50, 60, 70, 80, 90, 100, 110, 120, 130, 140, 150, 160, 170, 180, 190, 200, 210, 220, 230, 240, 250, 260, 270, 280 marked at the top. Consensus sequences are also marked at 290, 300, 310, 320, 330, 340, 350, 360, 370, 380, 390, 400, 410, 420, 430, 440, 450, 460, 470, 480, 490, 500, 510, 520, 530, 540, 550, 560, 570, 580, 590, 600, 610, 620, 630, 640, 650, 660, 670, 680, 690, 700, 710, 720, 730, 740, 750, 760, 770, 780, 790, 800, 810, 820, 830, 840, 850, 860, 870, 880, 890, 900, 910, 920, 930, 940, 950, 960, 970, 980, 990, 1,000, 1,010, 1,020, 1,030, 1,040, 1,050, 1,060, 1,070, 1,080, 1,090, 1,100, 1,110, 1,120, 1,130, 1,140, 1,150, 1,160, 1,170, 1,180, 1,190, 1,200, 1,210, 1,220, 1,230, 1,240, 1,250, 1,260, 1,270, 1,280, 1,290, 1,300, 1,310, 1,320, 1,330, 1,340, 1,350, 1,360, 1,370, 1,380, 1,390, 1,400, 1,410, 1,420, 1,430, 1,440, 1,450, 1,460, 1,470, 1,480, 1,490, 1,500, 1,510, 1,520, 1,530, 1,540, 1,550, 1,560, 1,570, 1,580, 1,590, 1,600, 1,610, 1,620, 1,630, 1,640, 1,650, 1,660, 1,670, 1,680, 1,690, 1,700, 1,710, 1,720, 1,730, 1,740, 1,750, 1,760, 1,770, 1,780, 1,790, 1,800, 1,810, 1,820, 1,830, 1,840, 1,850, 1,860, 1,870, 1,880, 1,890, 1,900, 1,910, 1,920, 1,930, 1,940, 1,950, 1,960, 1,970, 1,980, 1,990, 2,000, 2,010, 2,020, 2,030, 2,040, 2,050, 2,060, 2,070, 2,080, 2,090, 2,100, 2,110, 2,120, 2,130, 2,140, 2,150, 2,160, 2,170, 2,180, 2,190, 2,200, 2,210, 2,220, 2,230, 2,240, 2,250, 2,260, 2,270, 2,280, 2,290, 2,300, 2,310. The map also includes a legend for Consensus, Translation, and Identity, and a scale bar at the bottom.





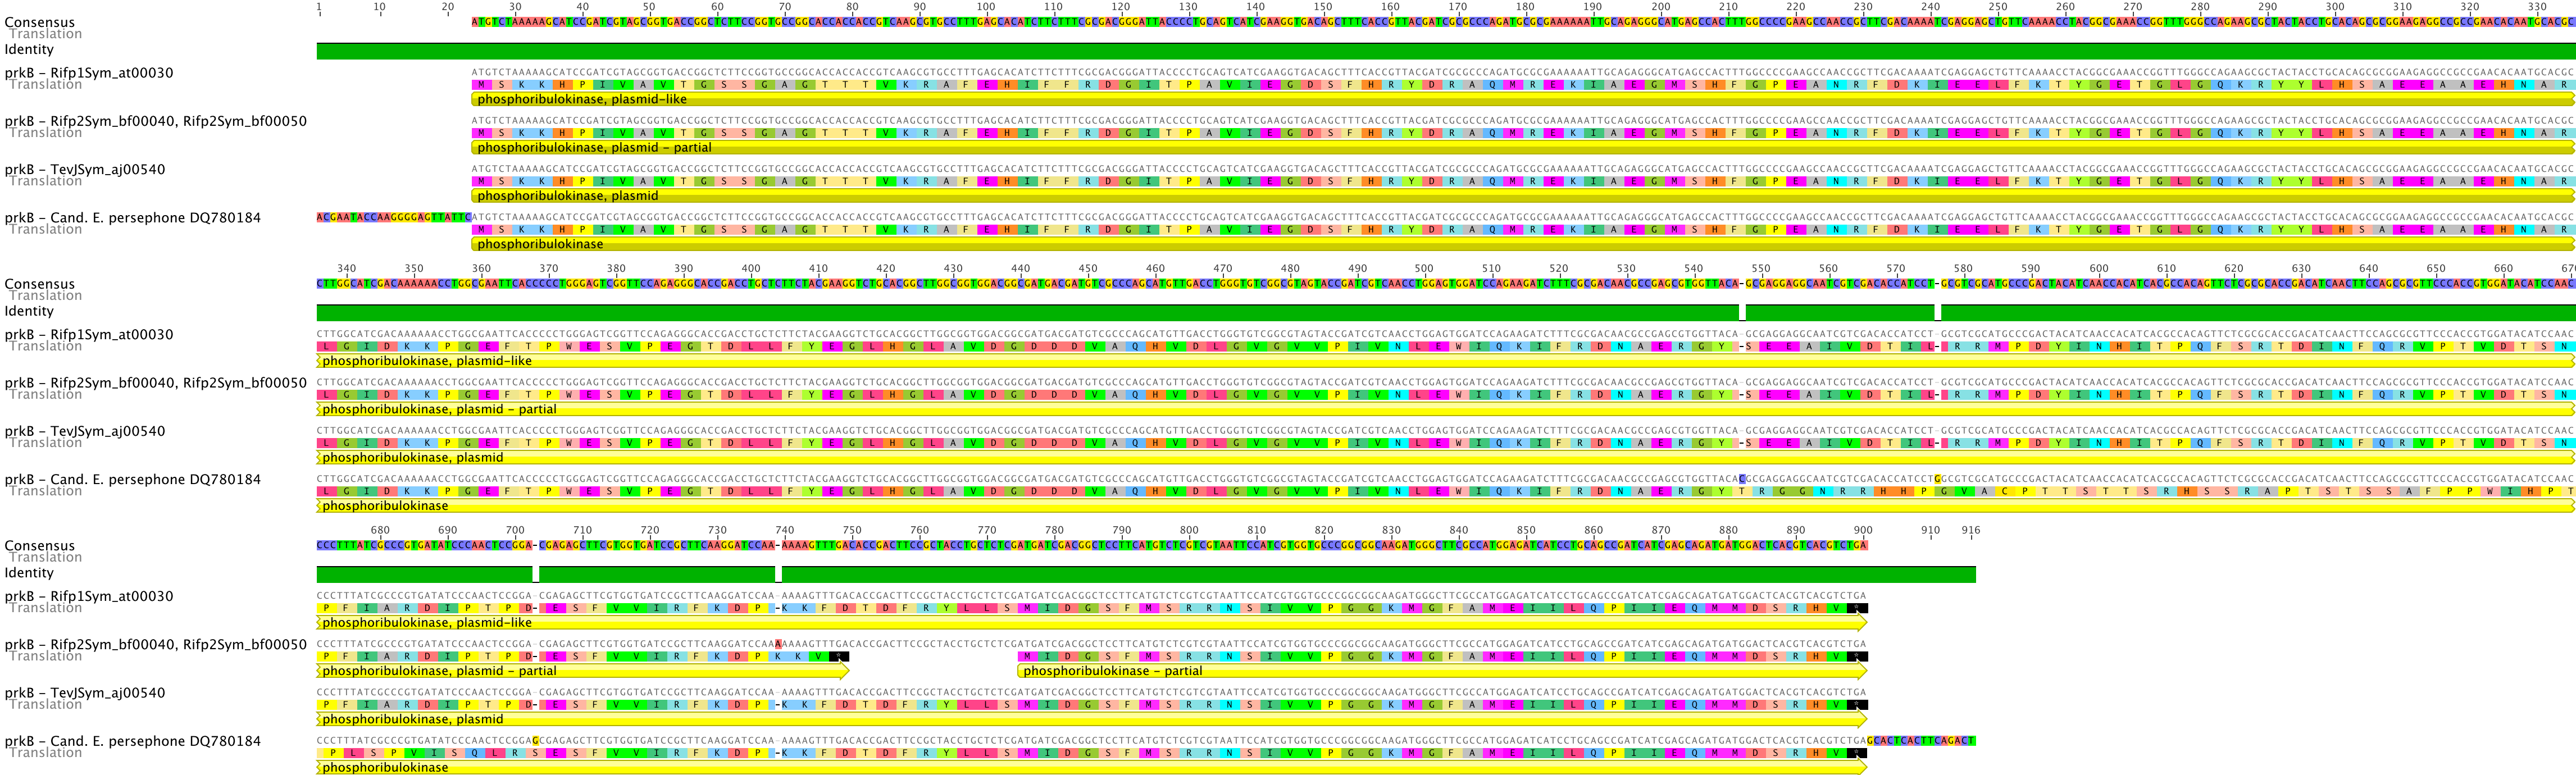

Genomic map showing consensus translation and identity for various proteins (sdhA1, sdhA) across different strains (Rifp1S1, Rifp2S1, TevJ1, Cand. E. persephone) and their putative functions (succinate dehydrogenase/fumarate reductase, putative fumarate reductase flavoprotein subunit).

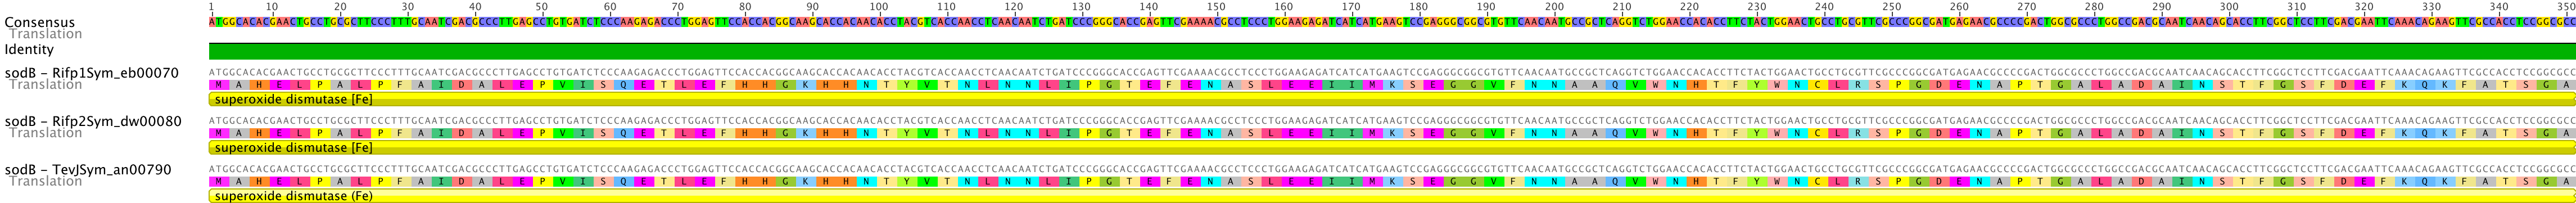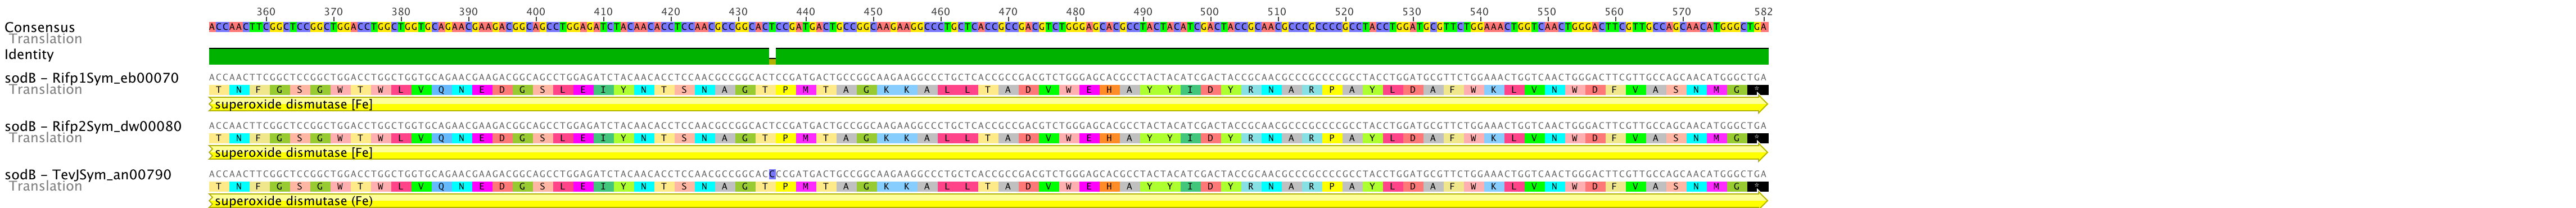

Supplement: ismej2011137x2.pdf [file ismej2011137x2.pdf]
