# Supplementary material
Source: PubMed Central journal article supplement (PMC3309349)
Supplement: ismej2011137x6.pdf [file ismej2011137x6.pdf]

Table S3 - Genes of particular interest

| Category                            | Gene                                                       | Function                                                  | <i>Riftia</i> 1 symbiont<br>Genbank accession     | <i>Riftia</i> 2 symbiont<br>Genbank accession     | <i>Tevnia</i> symbiont<br>Genbank accession |
|-------------------------------------|------------------------------------------------------------|-----------------------------------------------------------|---------------------------------------------------|---------------------------------------------------|---------------------------------------------|
| <b>1. Sulfur metabolism</b>         | <b>aprA</b>                                                | Adenylylsulfate reductase, alpha subunit                  | Rifp1Sym_ej00110                                  | Rifp2Sym_bz00020 <sup>1</sup><br>Rifp2Sym_bz00030 | TevJSym_ag00880                             |
|                                     | <b>aprB</b>                                                | Adenylylsulfate reductase, beta subunit                   | Rifp1Sym_ej00100                                  | Rifp2Sym_bz00040                                  | TevJSym_ag00890                             |
|                                     | <b>dsrA</b>                                                | Dissimilatory sulfite reductase, alpha subunit            | Rifp1Sym_am00340                                  | Rifp2Sym_aa00430 <sup>1</sup><br>Rifp2Sym_aa00440 | TevJSym_aw00210                             |
|                                     | <b>dsrB</b>                                                | Dissimilatory sulfite reductase, beta subunit             | Rifp1Sym_am00350                                  | Rifp2Sym_aa00410                                  | TevJSym_aw00190                             |
|                                     | <b>sopT</b>                                                | ATP-sulfurylase                                           | Rifp1Sym_cn00110                                  | Rifp2Sym_az00240                                  | TevJSym_ad01200                             |
| <b>2. Carbon metabolism</b>         | <b>cbbM</b>                                                | Ribulose-1,5-bisphosphate carboxylase/oxygenase           | Rifp1Sym_at00130                                  | Rifp2Sym_bi00210                                  | TevJSym_aj00630                             |
| 2.1 Calvin-Benson<br>-Bassham cycle | <b>gapA*</b>                                               | Glyceraldehyde-3-phosphate dehydrogenase                  | Rifp1Sym_dp00070                                  | Rifp2Sym_ar00120                                  | TevJSym_an00400                             |
|                                     | <b>pgk*</b>                                                | Phosphoglycerate kinase                                   | Rifp1Sym_dp00060                                  | Rifp2Sym_ar00110                                  | TevJSym_an00390                             |
|                                     | <b>prkB</b>                                                | Phosphoribulokinase                                       | Rifp1Sym_at00030                                  | Rifp2Sym_bf00040 <sup>1</sup><br>Rifp2Sym_bf00050 | TevJSym_aj00540                             |
| 2.2 TCA cycle                       | <b>aclA</b>                                                | ATP citrate lyase, alpha subunit                          | Rifp1Sym_bt00010                                  | Rifp2Sym_br00020                                  | TevJSym_az00180                             |
|                                     | <b>aclB</b>                                                | ATP citrate lyase, beta subunit                           | Rifp1Sym_bt00020                                  | Rifp2Sym_aa00010 <sup>1</sup><br>Rifp2Sym_br00010 | TevJSym_az00170                             |
|                                     | <b>acnA</b>                                                | Aconitate hydratase/aconitase A                           | Rifp1Sym_bt00040                                  | Rifp2Sym_aa00030                                  | TevJSym_az00150                             |
|                                     | <b>icd</b>                                                 | Isocitrate dehydrogenase [NADP]                           | Rifp1Sym_bt00030                                  | Rifp2Sym_aa00020                                  | TevJSym_az00160                             |
|                                     | <b>korA</b>                                                | 2-oxoglutarate oxidoreductase, alpha subunit <sup>2</sup> | Rifp1Sym_dm00080                                  | Rifp2Sym_br00130                                  | TevJSym_az00290                             |
|                                     | <b>korB</b>                                                | 2-oxoglutarate oxidoreductase, beta subunit <sup>2</sup>  | Rifp1Sym_aa00580                                  | Rifp2Sym_an00050                                  | TevJSym_bb00050                             |
|                                     |                                                            |                                                           | Rifp1Sym_dm00070                                  | Rifp2Sym_br00120                                  | TevJSym_az00280                             |
|                                     |                                                            |                                                           | Rifp1Sym_aa00590                                  | Rifp2Sym_an00040                                  | TevJSym_bb00040                             |
|                                     | <b>korC</b>                                                |                                                           | Rifp1Sym_bp00060                                  | Rifp2Sym_ab00610                                  | TevJSym_ar00620                             |
|                                     | <b>korD</b>                                                | 2-oxoglutarate oxidoreductase, delta subunit              | Rifp1Sym_dm00090                                  | Rifp2Sym_br00140                                  | TevJSym_az00300                             |
|                                     | <b>korG</b>                                                | 2-oxoglutarate oxidoreductase, gamma subunit              | Rifp1Sym_dm00060                                  | Rifp2Sym_br00110                                  | TevJSym_az00270                             |
|                                     | <b>gltA2</b>                                               | citrate synthase I                                        | Rifp1Sym_ax00310                                  | Rifp2Sym_aq00120                                  | TevJSym_bc00420                             |
|                                     | <b>maeB</b>                                                | malate dehydrogenase                                      | Rifp1Sym_ax00320 <sup>1</sup>                     | Rifp2Sym_aq00110 <sup>1</sup>                     | TevJSym_bc00430                             |
|                                     |                                                            |                                                           | Rifp1Sym_ax00330                                  | Rifp2Sym_aq00100                                  |                                             |
| <b>sdhA</b>                         | Succinate dehydrogenase, flavoprotein subunit <sup>2</sup> | Rifp1Sym_dd00140                                          | Rifp2Sym_ez00030                                  | TevJSym_ah01000                                   |                                             |
|                                     |                                                            | Rifp1Sym_ax00360                                          | Rifp2Sym_aq00070 <sup>1</sup><br>Rifp2Sym_aq00060 | TevJSym_cj00010                                   |                                             |
| <b>sdhB</b>                         | succinate dehydrogenase iron-sulfur protein <sup>2</sup>   | Rifp1Sym_dd00150                                          | Rifp2Sym_ez00020                                  | TevJSym_ah01010                                   |                                             |
|                                     |                                                            | Rifp1Sym_ax00370                                          | Rifp2Sym_aq00050                                  | TevJSym_cj00020                                   |                                             |

Table S3 - Genes of particular interest

| Category                            | Gene        | Function                                             | <i>Riftia</i> 1 symbiont<br>Genbank accession     | <i>Riftia</i> 2 symbiont<br>Genbank accession     | <i>Tevnia</i> symbiont<br>Genbank accession |
|-------------------------------------|-------------|------------------------------------------------------|---------------------------------------------------|---------------------------------------------------|---------------------------------------------|
|                                     | <b>sdhC</b> | succinate dehydrogenase membrane anchor <sup>2</sup> | Rifp1Sym_dd00130                                  | Rifp2Sym_ez00040                                  | TevJSym_ah00990                             |
|                                     |             |                                                      | Rifp1Sym_ax00350                                  | Rifp2Sym_aq00080                                  | TevJSym_bc00450                             |
|                                     | <b>sdhD</b> | succinate dehydrogenase cyt b subunit                | Rifp1Sym_ax00340                                  | Rifp2Sym_aq00090                                  | TevJSym_bc00440                             |
| <b>3. Nitrogen metabolism</b>       | <b>narG</b> | Respiratory nitrate reductase, alpha chain           | Rifp1Sym_ak00460                                  | Rifp2Sym_bt00080                                  | TevJSym_ag00800                             |
|                                     | <b>narH</b> | Respiratory nitrate reductase, beta chain            | Rifp1Sym_ak00450                                  | Rifp2Sym_bt00090                                  | TevJSym_ag00790                             |
|                                     | <b>narJ</b> | Respiratory nitrate reductase, delta chain           | Rifp1Sym_ak00440                                  | Rifp2Sym_bt00100                                  | TevJSym_ag00780                             |
|                                     | <b>narI</b> | Respiratory nitrate reductase, gamma chain           | Rifp1Sym_ak00430                                  | Rifp2Sym_bt00110                                  | TevJSym_ag00770                             |
|                                     | <b>napD</b> | Periplasmic nitrate reductase, subunit NapD          | Rifp1Sym_ao00250                                  | Rifp2Sym_bd00210                                  | TevJSym_al00660                             |
|                                     | <b>napA</b> | Periplasmic nitrate reductase, subunit NapA          | Rifp1Sym_ao00240 <sup>1</sup><br>Rifp1Sym_ao00230 | Rifp2Sym_bd00220                                  | TevJSym_al00650                             |
|                                     | <b>napG</b> | Periplasmic nitrate reductase, subunit NapG          | Rifp1Sym_ao00220                                  | Rifp2Sym_bd00230                                  | TevJSym_al00640                             |
|                                     | <b>napH</b> | Periplasmic nitrate reductase, subunit NapH          | Rifp1Sym_ao00210                                  | Rifp2Sym_bd00240                                  | TevJSym_al00630                             |
|                                     | <b>napB</b> | Periplasmic nitrate reductase, subunit NapB          | Rifp1Sym_ao00200                                  | Rifp2Sym_bd00240                                  | TevJSym_al00620                             |
|                                     | <b>napC</b> | Periplasmic nitrate reductase, subunit NapC          | Rifp1Sym_ao00190                                  | Rifp2Sym_bd00260                                  | TevJSym_al00610                             |
|                                     | <b>nirN</b> | Cytochrome cd1/nitrite reductase, subunit NirN       | Rifp1Sym_cp00140                                  | Rifp2Sym_db00140                                  | TevJSym_bo00090                             |
|                                     | <b>nirJ</b> | Cytochrome cd1/nitrite reductase, subunit NirJ       | Rifp1Sym_cp00120 <sup>1</sup><br>Rifp1Sym_cp00130 | Rifp2Sym_db00110                                  | TevJSym_bo00100                             |
|                                     | <b>nirH</b> | Cytochrome cd1/nitrite reductase, subunit NirH       | Rifp1Sym_cp00110                                  | Rifp2Sym_db00100                                  | TevJSym_bo00110                             |
|                                     | <b>nirG</b> | Cytochrome cd1/nitrite reductase, subunit NirG       | Rifp1Sym_cp00090                                  | Rifp2Sym_db00080                                  | TevJSym_bo00130                             |
|                                     | <b>nirL</b> | Cytochrome cd1/nitrite reductase, subunit NirL       | Rifp1Sym_cp00080                                  | Rifp2Sym_db00070                                  | TevJSym_bo00140                             |
|                                     | <b>nirD</b> | Cytochrome cd1/nitrite reductase, subunit NirD       | Rifp1Sym_cp00070                                  | Rifp2Sym_db00060                                  | TevJSym_bo00150                             |
|                                     | <b>nirF</b> | Cytochrome cd1/nitrite reductase, subunit NirF       | Rifp1Sym_cp00060                                  | Rifp2Sym_db00050                                  | TevJSym_bo00160                             |
|                                     | <b>nirC</b> | Cytochrome cd1/nitrite reductase, subunit NirC       | Rifp1Sym_cp00050                                  | Rifp2Sym_db00040                                  | TevJSym_bo00170                             |
|                                     | <b>nirT</b> | Cytochrome cd1/nitrite reductase, subunit NirT       | Rifp1Sym_cp00030                                  | n. a.                                             | TevJSym_bo00190                             |
|                                     | <b>nirS</b> | Cytochrome cd1/nitrite reductase, subunit NirS       | Rifp1Sym_cp00020                                  | Rifp2Sym_gn00030                                  | TevJSym_bo00200                             |
|                                     | <b>norB</b> | Nitric-oxide reductase subunit B                     | n. a.                                             | Rifp2Sym_jh00010                                  | TevJSym_cv00020                             |
|                                     | <b>norC</b> | Nitric-oxide reductase subunit C                     | n. a.                                             | Rifp2Sym_jh00030                                  | TevJSym_cv00010                             |
|                                     | <b>nosZ</b> | Nitrous-oxide reductase                              | Rifp1Sym_ag00460                                  | Rifp2Sym_au00130 <sup>1</sup><br>Rifp2Sym_au00140 | TevJSym_ac00130                             |
| <b>4. Storage compounds</b>         | <b>cphA</b> | Cyanophycin synthase                                 | Rifp1Sym_ah00040                                  | Rifp2Sym_at00040                                  | TevJSym_ay00040                             |
| <b>5. Oxidative stress response</b> | <b>ahpC</b> | Alkyl hydroperoxide reductase                        | Rifp1Sym_ai00550                                  | Rifp2Sym_af00050                                  | TevJSym_ah00580                             |
|                                     | <b>sodB</b> | Superoxide dismutase [Fe]                            | Rifp1Sym_eb00070                                  | Rifp2Sym_dw00080                                  | TevJSym_an00790                             |

Table S3 - Genes of particular interest

| Category                                | Gene         | Function                                                 | <i>Riftia</i> 1 symbiont<br>Genbank accession | <i>Riftia</i> 2 symbiont<br>Genbank accession | <i>Tevnia</i> symbiont<br>Genbank accession |
|-----------------------------------------|--------------|----------------------------------------------------------|-----------------------------------------------|-----------------------------------------------|---------------------------------------------|
| <b>6. Secretion systems</b>             | <b>secA</b>  | Preprotein translocase subunit SecA                      | Rifp1Sym_bc00080                              | Rifp2Sym_ax00280                              | TevJSym_aj00210                             |
| 6.1 Secretion across the inner membrane | <b>secB</b>  | Preprotein translocase subunit SecB                      | Rifp1Sym_cl00120                              | Rifp2Sym_as00170                              | TevJSym_at00230                             |
|                                         | <b>secD</b>  | Preprotein translocase subunit SecD                      | Rifp1Sym_cf00160                              | Rifp2Sym_ar00340                              | TevJSym_an00610                             |
|                                         | <b>secE</b>  | Preprotein translocase subunit SecE                      | Rifp1Sym_di00120                              | Rifp2Sym_dg00010                              | TevJSym_bu00110                             |
|                                         | <b>secF</b>  | Preprotein translocase subunit SecF                      | Rifp1Sym_cf00150                              | Rifp2Sym_ar00330                              | TevJSym_an00600                             |
|                                         | <b>secG</b>  | Preprotein translocase subunit SecG                      | Rifp1Sym_bl00190                              | Rifp2Sym_eh00010                              | TevJSym_ap00640                             |
|                                         | <b>secY</b>  | Preprotein translocase subunit SecY                      | Rifp1Sym_bd00210                              | Rifp2Sym_ce00130                              | TevJSym_aa00220                             |
|                                         | <b>tatA</b>  | Twin-arginine translocation protein TatA                 | Rifp1Sym_cq00210                              | Rifp2Sym_cb00170                              | TevJSym_bh00280                             |
|                                         | <b>tatB</b>  | Twin-arginine translocation protein TatB                 | Rifp1Sym_cq00220                              | Rifp2Sym_cb00180                              | TevJSym_bh00290                             |
|                                         | <b>tatC</b>  | Twin-arginine translocation protein TatC                 | Rifp1Sym_cq00230                              | Rifp2Sym_cb00190                              | TevJSym_bh00300                             |
| 6.3 Secretion across the outer membrane | <b>exeA</b>  | General secretion pathway protein A <sup>2</sup>         | Rifp1Sym_aa00370                              | Rifp2Sym_an00280                              | TevJSym_ab01170                             |
|                                         |              |                                                          | Rifp1Sym_bk00170                              | Rifp2Sym_bh00210                              | TevJSym_ai00590                             |
|                                         |              |                                                          | Rifp1Sym_cw00170                              | Rifp2Sym_cf00120                              | TevJSym_bb00270                             |
|                                         |              |                                                          | Rifp1Sym_ee00070                              | Rifp2Sym_dq00020                              | TevJSym_bg00130                             |
|                                         | <b>xpsD</b>  | General secretion pathway protein D                      | Rifp1Sym_ah00230                              | Rifp2Sym_do00140                              | TevJSym_ay00270                             |
|                                         | <b>outE</b>  | General secretion pathway protein E                      | Rifp1Sym_bk00160                              | Rifp2Sym_bh00200                              | TevJSym_bg00140                             |
|                                         | <b>xcpR</b>  | General secretion pathway protein E                      | Rifp1Sym_ci00020                              | Rifp2Sym_be00150                              | TevJSym_av00370                             |
|                                         | <b>xcpS</b>  | General secretion pathway protein F                      | Rifp1Sym_ci00030                              | Rifp2Sym_be00160                              | TevJSym_av00380                             |
| <b>7. Horizontal gene transfer</b>      | <b>traG</b>  | IncF plasmid conjugative transfer protein TraG           | Rifp1Sym_au00110                              | -                                             | -                                           |
| 7.1 F-Type conjugative plasmid          | <b>traH</b>  | IncF plasmid conjugative transfer pilus assembly protein | Rifp1Sym_au00120                              | -                                             | -                                           |
|                                         | <b>traF</b>  | IncF plasmid conjugative transfer pilus assembly protein | Rifp1Sym_au00130                              | -                                             | -                                           |
|                                         | <b>traN</b>  | IncF plasmid conjugative transfer protein TraN           | Rifp1Sym_au00140                              | -                                             | -                                           |
|                                         | <b>trbC</b>  | IncF plasmid conjugative transfer protein TrbC           | Rifp1Sym_au00150                              | -                                             | -                                           |
|                                         | <b>traU</b>  | IncF plasmid conjugative transfer pilus assembly protein | Rifp1Sym_au00160                              | -                                             | -                                           |
|                                         | <b>pat17</b> | Patatin-like phospholipase A2                            | Rifp1Sym_au00170                              | -                                             | -                                           |
|                                         | <b>traC</b>  | IncF plasmid conjugative transfer pilus assembly protein | Rifp1Sym_au00200                              | -                                             | -                                           |
|                                         | <b>traV</b>  | Conjugative transfer protein TraV                        | Rifp1Sym_au00210                              | -                                             | -                                           |
|                                         | <b>traB</b>  | IncF plasmid conjugative transfer pilus assembly protein | Rifp1Sym_au00230                              | -                                             | -                                           |
|                                         | <b>traK</b>  | IncF plasmid conjugative transfer pilus assembly protein | Rifp1Sym_au00240                              | -                                             | -                                           |
|                                         | <b>traE</b>  | Plasmid-like conjugative transfer protein TraE           | Rifp1Sym_au00250                              | -                                             | -                                           |
| 7.2 Transposases                        | -            | IS5Y transposase                                         | Rifp1Sym_al00300                              | Rifp2Sym_aw00230                              | TevJSym_bc00030                             |
|                                         | -            | IS5 transposase                                          | Rifp1Sym_al00310                              | Rifp2Sym_aw00240                              | TevJSym_bc00040                             |

Table S3 - Genes of particular interest

| Category                                      | Gene        | Function                                            | <i>Riftia</i> 1 symbiont<br>Genbank accession                         | <i>Riftia</i> 2 symbiont<br>Genbank accession     | <i>Tevnia</i> symbiont<br>Genbank accession |
|-----------------------------------------------|-------------|-----------------------------------------------------|-----------------------------------------------------------------------|---------------------------------------------------|---------------------------------------------|
|                                               | -           | Transposase insF for insertion sequence IS3         | Rifp1Sym_bb00110                                                      | Rifp2Sym_dh00120                                  | TevJSym_ab01630                             |
|                                               | -           | Transposase for IS1668                              | Rifp1Sym_bg00180                                                      | Rifp2Sym_bl00030                                  | TevJSym_bf00240                             |
|                                               | -           | Transposase, IS4 family                             | Rifp1Sym_db00080                                                      | Rifp2Sym_jp00010                                  | TevJSym_cx00010                             |
| <b>8. Possibly involved in host infection</b> | <b>fimT</b> | Type IV fimbrial biogenesis protein FimT            | Rifp1Sym_aq00380                                                      | Rifp2Sym_ak00170                                  | TevJSym_am00340                             |
|                                               | <b>fimV</b> | Type IV pilus assembly protein FimV                 | Rifp1Sym_dy00020                                                      | Rifp2Sym_ab00080                                  | TevJSym_ar00130                             |
| 8.1 Adherence by type IV pili/fimbriae        | <b>pilB</b> | Type IV fimbrial assembly protein PilB              | Rifp1Sym_az00200                                                      | Rifp2Sym_ba00260                                  | TevJSym_ai00290                             |
|                                               | <b>pilE</b> | Type IV pilus biogenesis protein PilE               | Rifp1Sym_an00070                                                      | Rifp2Sym_ak00100                                  | TevJSym_am00410                             |
|                                               | <b>pilG</b> | twitching motility protein PilG                     | Rifp1Sym_cb00050                                                      | Rifp2Sym_cj00200                                  | TevJSym_bn00040                             |
|                                               | <b>pilH</b> | twitching motility protein PilH                     | Rifp1Sym_cb00040                                                      | Rifp2Sym_cj00210                                  | TevJSym_bn00030                             |
|                                               | <b>pilM</b> | Type IV pilus biogenesis protein PilM               | Rifp1Sym_aa00490                                                      | Rifp2Sym_an00140                                  | TevJSym_bb00140                             |
|                                               | <b>pilN</b> | Type IV pilus biogenesis protein PilN               | Rifp1Sym_aa00480                                                      | Rifp2Sym_an00150                                  | TevJSym_bb00150                             |
|                                               | <b>pilQ</b> | Type IV pilus biogenesis protein PilQ               | Rifp1Sym_aa00450                                                      | Rifp2Sym_an00180                                  | TevJSym_bb00180                             |
|                                               | <b>pilR</b> | Type IV fimbriae expression regulatory protein PilR | Rifp1Sym_az00160                                                      | Rifp2Sym_ba00220                                  | TevJSym_ai00250                             |
|                                               | <b>pilS</b> | Sensor protein PilS                                 | Rifp1Sym_az00150                                                      | Rifp2Sym_ba00210                                  | TevJSym_ai00240                             |
|                                               | <b>pilT</b> | Twitching mobility protein PilT                     | Rifp1Sym_aq00280                                                      | Rifp2Sym_ak00290                                  | TevJSym_am00210                             |
|                                               | <b>pilV</b> | Type IV pilus modification protein PilV             | Rifp1Sym_aq00390                                                      | Rifp2Sym_ak00160                                  | TevJSym_am00350                             |
|                                               | <b>pilY</b> | Type IV fimbrial biogenesis protein PilY            | Rifp1Sym_an00030 <sup>1</sup><br>Rifp1Sym_an00040<br>Rifp1Sym_an00050 | Rifp2Sym_ak00120 <sup>1</sup><br>Rifp2Sym_ak00130 | TevJSym_am00390                             |
|                                               | <b>pilZ</b> | Type IV pilus assembly PilZ                         | Rifp1Sym_ax00100                                                      | Rifp2Sym_aq00310                                  | TevJSym_bc00220                             |
|                                               | <b>mshL</b> | Pilus (MSHA Type) biogenesis protein MshL           | Rifp1Sym_bk00190                                                      | Rifp2Sym_bh00230                                  | TevJSym_bg00100                             |
| 8.2 Adherence by flagellum                    | <b>flaG</b> | Flagellin protein FlaG                              | Rifp1Sym_fp00070                                                      | Rifp2Sym_bk00240                                  | TevJSym_aa01600                             |
|                                               | <b>fleN</b> | Flagellar synthesis regulator FleN                  | Rifp1Sym_am00080                                                      | Rifp2Sym_aa00690                                  | TevJSym_aw00490                             |
|                                               | <b>flgA</b> | Flagellar basal-body P-ring formation protein FlgA  | Rifp1Sym_bw00270                                                      | Rifp2Sym_aj00140                                  | TevJSym_aa01200                             |
|                                               | <b>flgE</b> | Flagellar hook protein FlgE                         | Rifp1Sym_bw00220                                                      | Rifp2Sym_aj00100                                  | TevJSym_aa01250                             |
|                                               | <b>flgF</b> | Flagellar basal-body rod protein FlgF               | Rifp1Sym_bw00210                                                      | Rifp2Sym_aj00090                                  | TevJSym_aa01260                             |
|                                               | <b>flgH</b> | Flagellar L-ring protein FlgH                       | Rifp1Sym_bw00190                                                      | Rifp2Sym_aj00070                                  | TevJSym_aa01280                             |
|                                               | <b>flhA</b> | Flagellar biosynthesis protein FlhA                 | Rifp1Sym_am00060                                                      | Rifp2Sym_aa00720                                  | TevJSym_aw00510                             |
|                                               | <b>fliA</b> | RNA polymerase sigma factor for flagellar operon    | Rifp1Sym_am00090                                                      | Rifp2Sym_aa00680                                  | TevJSym_aw00480                             |
|                                               | <b>fliD</b> | Flagellar hook-associated protein 2                 | Rifp1Sym_fp00060                                                      | Rifp2Sym_bk00250                                  | TevJSym_aa01610                             |
|                                               | <b>fliG</b> | Flagellar motor switch protein FliG                 | Rifp1Sym_cx00180                                                      | Rifp2Sym_cm00100                                  | TevJSym_ac00750                             |
|                                               | <b>fliJ</b> | Flagellar protein FliJ                              | Rifp1Sym_ck00160                                                      | Rifp2Sym_cm00060                                  | TevJSym_ac00720                             |
|                                               | <b>fliM</b> | Flagellar motor switch protein FliM                 | Rifp1Sym_ct00010                                                      | Rifp2Sym_aa00790                                  | TevJSym_aw00580                             |

Table S3 - Genes of particular interest

| Category                  | Gene          | Function                              | <i>Riftia</i> 1 symbiont<br>Genbank accession | <i>Riftia</i> 2 symbiont<br>Genbank accession     | <i>Tevnia</i> symbiont<br>Genbank accession |
|---------------------------|---------------|---------------------------------------|-----------------------------------------------|---------------------------------------------------|---------------------------------------------|
| 8.3 Cell attachment       | <b>motA</b>   | Flagellar motor rotation protein motA | Rifp1Sym_am00130                              | Rifp2Sym_aa00640                                  | TevJSym_aw00430                             |
|                           | <b>motB</b>   | Flagellar motor rotation protein motB | Rifp1Sym_am00140                              | Rifp2Sym_aa00630                                  | TevJSym_aw00420                             |
|                           | -             | Flagellar hook-length control protein | Rifp1Sym_da00090                              | Rifp2Sym_ay00290                                  | TevJSym_ac01170                             |
|                           | -             | Outer membrane adhesin-like protein   | Rifp1Sym_gp00020                              | Rifp2Sym_fz00070                                  | TevJSym_ae00280                             |
|                           | -             | Hyalin                                | Rifp1Sym_bg00190                              | Rifp2Sym_bl00010 <sup>1</sup><br>Rifp2Sym_bl00020 | TevJSym_bf00250                             |
|                           | -             | Fibronectin Type III domain protein   | Rifp1Sym_bo00250                              | Rifp2Sym_al00110 <sup>1</sup><br>Rifp2Sym_al00120 | TevJSym_au00400                             |
| 8.4 Cell permeabilization | -             | Cell wall associated biofilm protein  | Rifp1Sym_ah00020                              | Rifp2Sym_at00010 <sup>1</sup><br>Rifp2Sym_at00020 | TevJSym_ay00010                             |
|                           | <b>hlyIII</b> | Hemolysin III-like protein            | Rifp1Sym_bh00190                              | Rifp2Sym_ab00180                                  | TevJSym_ar00200                             |
|                           | <b>hlyD</b>   | Type I secretion protein, HlyD family | Rifp1Sym_ac00300                              | Rifp2Sym_hb00070                                  | TevJSym_bj00240                             |
|                           | <b>kamA</b>   | Lysine 2,3-aminomutase                | Rifp1Sym_ey00040                              | Rifp2Sym_ar00010                                  | TevJSym_an00300                             |
|                           | <b>cvpA</b>   | Colicin V production protein          | Rifp1Sym_av00210                              | Rifp2Sym_ci00100                                  | TevJSym_av00130                             |
