# Supplementary material
Source: PubMed Central journal article supplement (PMC3309349)
Supplement: ismej2011137x7.pdf [file ismej2011137x7.pdf]

Table S4 - Comparison of intracellular soluble proteins

| Protein                                 | Function                                                                     | E.C.     | pI   | MW (kDa) | <i>Tevnia jerichonana</i> symbiont |       |               |             |                   | <i>Riftia pachyptila</i> symbiont |       |               |             |                   | Spot ratio |
|-----------------------------------------|------------------------------------------------------------------------------|----------|------|----------|------------------------------------|-------|---------------|-------------|-------------------|-----------------------------------|-------|---------------|-------------|-------------------|------------|
|                                         |                                                                              |          |      |          | Accession number                   | %Vol  | Peptide count | Mowse score | Sequence coverage | Accession number                  | %Vol  | Peptide count | Mowse score | Sequence coverage |            |
| <b>Sulfur metabolism and energetics</b> |                                                                              |          |      |          |                                    |       |               |             |                   |                                   |       |               |             |                   |            |
| <b>SopT</b>                             | ATP-sulfurylase                                                              | 2.7.7.4  | 4.99 | 43.9     | TevJSym_a d01200                   | 1.249 | 11            | 268         | 50                | Rifp1Sym_cn 00110                 | 0.737 | 12            | 329         | 54                | -1.7       |
| <b>DsrC</b>                             | Sulfur oxidation protein DsrC                                                | 1.8.99.3 | 4.81 | 12.4     | TevJSym_a w00150                   | 0.982 | 5             | 236         | 46                | Rifp1Sym_a m00390                 | 1.911 | 5             | 261         | 46                | 1.9        |
| <b>DsrE</b>                             | Sulfur oxidation protein DsrE, similar to sulfur relay protein TusD          |          | 5.28 | 14.3     | TevJSym_a w00180                   | 0.174 | 12            | 246         | 83                | Rifp1Sym_a m00360                 | 0.548 | 13            | 321         | 94                | 3.1        |
| <b>DsrF</b>                             | Putative sulfur oxidation protein DsrF, similar to sulfur relay protein TusC |          | 4.03 | 15.4     | TevJSym_a w00170                   | 0.173 | 6             | 99          | 48                | Rifp1Sym_a m00370                 | 0.394 | 8             | 193         | 48                | 2.3        |
| <b>Respiratory chain</b>                |                                                                              |          |      |          |                                    |       |               |             |                   |                                   |       |               |             |                   |            |
| <b>AtpD</b>                             | ATP synthase beta chain                                                      | 3.6.3.14 | 4.80 | 49.5     | TevJSym_a q00460                   | 0.448 | 33            | 864         | 83                | Rifp1Sym_ae 00390                 | 0.303 | 30            | 821         | 81                | -1.5       |
| <b>HdrA1</b>                            | Heterodisulfide reductase, subunit A                                         | 1.8.98.1 | 5.28 | 69.9     | TevJSym_a g00680                   | 0.707 | 25            | 522         | 48                | Rifp1Sym_d m00050                 | 0.434 | 18            | 343         | 45                | -1.6       |
| <b>HdrB2</b>                            | Heterodisulfide reductase, subunit B                                         | 1.8.98.1 | 4.95 | 29.3     | TevJSym_a g00710                   | 0.410 | 13            | 213         | 40                | Rifp1Sym_ak 00380                 | 0.279 | 10            | 184         | 37                | -1.5       |
| <b>NuoD1</b>                            | NADH-quinone oxidoreductase, chain D                                         | 1.6.99.5 | 5.59 | 47.3     | TevJSym_a p00590                   | 0.358 | 13            | 194         | 44                | Rifp1Sym_bl0 0230                 | 0.240 | 13            | 195         | 41                | -1.5       |
| <b>NuoG</b>                             | NADH-quinone oxidoreductase, chain G                                         | 1.6.99.5 | 5.36 | 82.8     | TevJSym_a p00560                   | 0.402 | 27            | 517         | 34                | Rifp1Sym_bl0 0260                 | 0.249 | 29            | 407         | 39                | -1.6       |
| <b>YhfP</b>                             | Putative quinone oxidoreductase                                              | 1.6.5.-  | 5.19 | 35.2     | TevJSym_a m00430                   | 0.308 | 10            | 341         | 38                | Rifp1Sym_an 00090                 | 0.108 | 14            | 556         | 47                | -2.9       |

Table S4 - Comparison of intracellular soluble proteins

| Protein                               | Function                                                          | E.C.     | pI   | MW (kDa) | <i>Tevnia jerichonana</i> symbiont |       |               |             |                   | <i>Riftia pachyptila</i> symbiont |       |               |             |                   | Spot ratio |
|---------------------------------------|-------------------------------------------------------------------|----------|------|----------|------------------------------------|-------|---------------|-------------|-------------------|-----------------------------------|-------|---------------|-------------|-------------------|------------|
|                                       |                                                                   |          |      |          | Accession number                   | %Vol  | Peptide count | Mowse score | Sequence coverage | Accession number                  | %Vol  | Peptide count | Mowse score | Sequence coverage |            |
| <b>Carbon metabolism</b>              |                                                                   |          |      |          |                                    |       |               |             |                   |                                   |       |               |             |                   |            |
| <b>I. Calvin-Benson-Bassham cycle</b> |                                                                   |          |      |          |                                    |       |               |             |                   |                                   |       |               |             |                   |            |
| <b>FbaA*</b>                          | Fructose-bisphosphate aldolase class-II                           | 4.1.2.13 | 5.18 | 38.2     | TevJSym_a n00370                   | 0.566 | 16            | 336         | 50                | Rifp1Sym_dp 00040                 | 0.372 | 17            | 376         | 56                | -1.5       |
| <b>GapA*</b>                          | Glyceraldehyde-3-phosphate dehydrogenase                          | 1.2.1.13 | 7.64 | 31.5     | TevJSym_a n00400                   | 0.633 | 10            | 244         | 34                | Rifp1Sym_dp 00070                 | 0.403 | 17            | 481         | 56                | -1.6       |
| <b>Pgk*</b>                           | Phosphoglycerate kinase                                           | 2.7.2.3  | 4.73 | 41.9     | TevJSym_a n00390                   | 0.483 | 15            | 532         | 53                | Rifp1Sym-dp00060                  | 0.323 | 18            | 563         | 61                | -1.5       |
| <b>CbbM</b>                           | Ribulose-1,5-bisphosphate carboxylase/oxygenase                   | 4.1.1.39 | 5.19 | 50.5     | TevJSym_aj 00630                   | 1.080 | 20            | 467         | 54                | Rifp1Sym_at 00130                 | 1.759 | 24            | 526         | 56                | 1.6        |
| <b>TpiA*</b>                          | Triosephosphate isomerase                                         | 5.3.1.1  | 4.71 | 26.2     | TevJSym_a p00650                   | 0.274 | 11            | 241         | 37                | Rifp1Sym-bl00180                  | 0.414 | 11            | 257         | 35                | 1.5        |
| <b>II. Reductive TCA cycle</b>        |                                                                   |          |      |          |                                    |       |               |             |                   |                                   |       |               |             |                   |            |
| <b>AcIA</b>                           | ATP citrate lyase, alpha subunit                                  | 2.3.3.8  | 5.25 | 43.6     | TevJSym_a z00180                   | 0.946 | 21            | 514         | 54                | Rifp1Sym_bt 00010                 | 0.605 | 6             | 181         | 37                | -1.6       |
| <b>AcIB</b>                           | ATP citrate lyase, beta subunit                                   | 2.3.3.8  | 5.59 | 96.7     | TevJSym_a z00170                   | 0.094 | 19            | 218         | 30                | Rifp1Sym_bt 00020                 | 0.058 | 21            | 303         | 32                | -1.6       |
| <b>FumB</b>                           | Fumarate hydratase class I                                        | 4.2.1.2  | 5.28 | 54.9     | TevJSym_a m00440                   | 0.331 | 24            | 535         | 51                | Rifp1Sym_an 00120                 | 0.149 | 16            | 403         | 61                | -2.2       |
| <b>KorA1</b>                          | 2-oxoglutarate oxidoreductase, alpha subunit                      | 1.2.7.1  | 5.31 | 42.4     | TevJSym_a z00290                   | 2.125 | 20            | 475         | 75                | Rifp1Sym_d m00080                 | 1.266 | 20            | 470         | 58                | -1.7       |
| <b>KorB1</b>                          | 2-oxoglutarate oxidoreductase, beta subunit                       | 1.2.7.3  | 4.92 | 36.7     | TevJSym_a z00280                   | 1.416 | 18            | 619         | 64                | Rifp1Sym_d m00070                 | 0.946 | 18            | 466         | 62                | -1.5       |
| <b>KorG1</b>                          | Putative 2-oxoglutarate oxidoreductase, gamma subunit             | 1.2.7.3  | 6.15 | 20.8     | TevJSym_a z00270                   | 0.644 | 16            | 313         | 85                | Rifp1Sym_d m00060                 | 0.439 | 16            | 343         | 86                | -1.5       |
| <b>SdhA1</b>                          | Succinate dehydrogenase/ fumarate reductase, flavoprotein subunit | 1.3.99.1 | 5.87 | 63.1     | TevJSym_a z00330                   | 1.947 | 28            | 474         | 56                | Rifp1Sym_d m00120                 | 1.277 | 28            | 508         | 56                | -1.5       |
| <b>SucC</b>                           | Succinyl-CoA synthetase, beta subunit                             | 6.2.1.5  | 4.83 | 40.5     | TevJSym_a q00800                   | 0.338 | 29            | 786         | 71                | Rifp1Sym_aa 00640                 | 0.176 | 15            | 340         | 53                | -1.9       |
| <b>SucD</b>                           | Succinyl-CoA synthetase, alpha subunit                            | 6.2.1.5  | 5.67 | 29.6     | TevJSym_a q00790                   | 0.334 | 10            | 423         | 49                | Rifp1Sym_aa 00650                 | 0.219 | 11            | 504         | 53                | -1.5       |

Table S4 - Comparison of intracellular soluble proteins

| Protein                                                  | Function                                        | E.C.      | pI   | MW (kDa) | <i>Tevnia jerichonana</i> symbiont |       |               |             |                   | <i>Riftia pachyptila</i> symbiont |       |               |             |                   | Spot ratio |
|----------------------------------------------------------|-------------------------------------------------|-----------|------|----------|------------------------------------|-------|---------------|-------------|-------------------|-----------------------------------|-------|---------------|-------------|-------------------|------------|
|                                                          |                                                 |           |      |          | Accession number                   | %Vol  | Peptide count | Mowse score | Sequence coverage | Accession number                  | %Vol  | Peptide count | Mowse score | Sequence coverage |            |
| <b>III. Organic carbon metabolism</b>                    |                                                 |           |      |          |                                    |       |               |             |                   |                                   |       |               |             |                   |            |
| <b>Eno</b>                                               | Enolase                                         | 4.2.1.11  | 4.68 | 45.3     | TevJSym_au00510                    | 0.156 | 26            | 326         | 59                | Rifp1Sym_bo00130                  | 0.084 | 25            | 585         | 59                | -1.9       |
| <b>GlgC</b>                                              | Glucose-1-phosphate adenylyltransferase         | 2.7.7.27  | 5.52 | 47.3     | TevJSym_ac01030                    | 0.193 | 19            | 488         | 53                | Rifp1Sym_dh00120                  | 0.104 | 21            | 357         | 50                | -1.9       |
| <b>PfkA</b>                                              | 6-Phosphofructokinase                           | 2.7.1.11  | 5.28 | 37.8     | TevJSym_by00080                    | 0.468 | 11            | 324         | 40                | Rifp1Sym_fe00080                  | 0.299 | 7             | 195         | 47                | -1.6       |
| <b>Por2</b>                                              | Pyruvate-ferredoxin oxidoreductase, homodimeric | 1.2.7.1   | 5.11 | 183.9    | TevJSym_br00020                    | 0.805 | 40            | 514         | 31                | Rifp1Sym_al00270                  | 0.338 | 41            | 564         | 30                | -2.4       |
| <b>WcaG1</b>                                             | Nucleoside-diphosphate-sugar epimerase          | 5.1.3.2   | 5.66 | 43.6     | TevJSym_ai00760                    | 0.129 | 11            | 304         | 43                | Rifp1Sym_bu00060                  | 0.202 | 14            | 334         | 50                | 1.6        |
| <b>Stress response</b>                                   |                                                 |           |      |          |                                    |       |               |             |                   |                                   |       |               |             |                   |            |
| <b>AhpC</b>                                              | Alkyl hydroperoxide reductase, subunit C        | 1.11.1.15 | 4.64 | 22.0     | TevJSym_ah00580                    | 1.594 | 10            | 300         | 58                | Rifp1Sym_ai00550                  | 3.358 | 14            | 246         | 58                | 2.1        |
| <b>SodB</b>                                              | Superoxide dismutase [Fe]                       | 1.15.1.1  | 4.74 | 21.5     | TevJSym_an00790                    | 0.176 | 7             | 164         | 60                | Rifp1Sym_eb00070                  | 0.325 | 5             | 131         | 42                | 1.8        |
| <b>TrxB</b>                                              | Thioredoxin reductase                           | 1.8.1.9   | 4.89 | 34.5     | TevJSym_ah00160                    | 0.122 | 15            | 502         | 48                | Rifp1Sym_ai00120                  | 0.284 | 15            | 508         | 43                | 2.3        |
| <b>Protein processing, degradation and translocation</b> |                                                 |           |      |          |                                    |       |               |             |                   |                                   |       |               |             |                   |            |
| <b>HflK</b>                                              | Putative FtsH protease regulator                |           | 5.68 | 41.6     | TevJSym_bl00180                    | 0.297 | 26            | 533         | 62                | Rifp1Sym_bj00120                  | 0.433 | 27            | 580         | 67                | 1.5        |
| <b>PpiB</b>                                              | Peptidyl-prolyl cis-trans isomerase B           | 5.2.1.8   | 4.86 | 17.7     | TevJSym_aa02180                    | 0.126 | 9             | 330         | 73                | Rifp1Sym_af00100                  | 0.410 | 11            | 405         | 73                | 3.3        |
| <b>SecB</b>                                              | Preprotein translocase, chaperone subunit       |           | 4.57 | 17.5     | TevJSym_at00230                    | 0.126 | 5             | 252         | 33                | Rifp1Sym_cl00120                  | 0.203 | 6             | 319         | 46                | 1.6        |

Table S4 - Comparison of intracellular soluble proteins

| Protein                                                       | Function                                                                                     | E.C.                | pI   | MW (kDa) | <i>Tevnia jerichonana</i> symbiont |       |               |             |                   | <i>Riftia pachyptila</i> symbiont |       |               |             |                   | Spot ratio |
|---------------------------------------------------------------|----------------------------------------------------------------------------------------------|---------------------|------|----------|------------------------------------|-------|---------------|-------------|-------------------|-----------------------------------|-------|---------------|-------------|-------------------|------------|
|                                                               |                                                                                              |                     |      |          | Accession number                   | %Vol  | Peptide count | Mowse score | Sequence coverage | Accession number                  | %Vol  | Peptide count | Mowse score | Sequence coverage |            |
| <b>Amino acid and lipid metabolism</b>                        |                                                                                              |                     |      |          |                                    |       |               |             |                   |                                   |       |               |             |                   |            |
| <b>AcpP</b>                                                   | Putative acyl carrier protein                                                                |                     | 3.89 | 8.6      | TevJSym_bc00160                    | 0.442 | 4             | 147         | 44                | Rifp1Sym_ax00040                  | 0.289 | 5             | 294         | 44                | -1.5       |
| <b>ArgG</b>                                                   | Argininosuccinate synthase                                                                   | 6.3.4.5             | 4.92 | 45.4     | TevJSym_am00650                    | 0.246 | 20            | 444         | 50                | Rifp1Sym_an00280                  | 0.138 | 22            | 444         | 54                | -1.8       |
| <b>AroG</b>                                                   | Phospho-2-dehydro-3-deoxyheptonate aldolase                                                  | 2.5.1.54            | 5.72 | 39.5     | TevJSym_aj00720                    | 0.144 | 17            | 371         | 53                | Rifp1Sym_at00220                  | 0.057 | 15            | 388         | 48                | -2.5       |
| <b>GlnA</b>                                                   | Glutamine synthetase                                                                         | 6.3.1.2             | 4.76 | 51.8     | TevJSym_aq00060                    | 0.922 | 17            | 298         | 64                | Rifp1Sym_ae00070                  | 0.452 | 25            | 543         | 72                | -2.0       |
| <b>GlyA</b>                                                   | Serine hydroxymethyltransferase 1                                                            | 2.1.2.1             | 5.49 | 45.6     | TevJSym_ab01480                    | 0.252 | 16            | 485         | 45                | Rifp1Sym_bb00260                  | 0.143 | 18            | 441         | 50                | -1.8       |
| <b>IlvB</b>                                                   | Acetolactate synthase, large subunit                                                         | 2.2.1.6             | 6.06 | 62.9     | TevJSym_af00570                    | 0.139 | 20            | 372         | 45                | Rifp1Sym_bi00090                  | 0.086 | 15            | 165         | 32                | -1.6       |
| <b>IlvC</b>                                                   | Ketol-acid reductoisomerase                                                                  | 1.1.1.86            | 5.21 | 36.5     | TevJSym_af00550                    | 0.764 | 22            | 568         | 67                | Rifp1Sym_bi00110                  | 0.425 | 15            | 327         | 46                | -1.8       |
| <b>ThrA</b>                                                   | Homoserine dehydrogenase                                                                     | 1.1.1.3             | 4.96 | 46.7     | TevJSym_ba00270                    | 0.101 | 24            | 443         | 59                | Rifp1Sym_aj00110                  | 0.063 | 21            | 429         | 48                | -1.6       |
| <b>TrpC</b>                                                   | Indole-3-glycerol phosphate synthase                                                         | 4.1.1.48            | 4.95 | 29.4     | TevJSym_ag00370                    | 0.055 | 11            | 103         | 47                | Rifp1Sym_ak00030                  | 0.110 | 12            | 287         | 52                | 2.0        |
| <b>Transcription, translation and nucleic acid metabolism</b> |                                                                                              |                     |      |          |                                    |       |               |             |                   |                                   |       |               |             |                   |            |
| <b>PurA</b>                                                   | Adenylosuccinate synthetase                                                                  | 6.3.4.4             | 5.58 | 46.7     | TevJSym_bli00140                   | 0.431 | 22            | 618         | 58                | Rifp1Sym_bj00070                  | 0.271 | 19            | 273         | 41                | -1.6       |
| <b>PurH</b>                                                   | Bifunctional phosphoribosylamino-imidazolecarboxamide formyltransferase / IMP cyclohydrolase | 2.1.2.3<br>3.5.4.10 | 5.07 | 56.1     | TevJSym_ao00430                    | 0.399 | 25            | 648         | 64                | Rifp1Sym_ac00130                  | 0.252 | 27            | 666         | 62                | -1.6       |
| <b>RpoB</b>                                                   | DNA-directed RNA polymerase, subunit beta                                                    | 2.7.7.6             | 5.40 | 151.0    | TevJSym_bu00050                    | 0.264 | 45            | 805         | 49                | Rifp1Sym_di00060                  | 0.176 | 47            | 684         | 45                | -1.5       |
| <b>AdoK</b>                                                   | Adenosine kinase                                                                             | 2.7.1.20            | 4.72 | 34.2     | TevJSym_ao00080                    | 0.069 | 12            | 191         | 44                | Rifp1Sym_ac00510                  | 0.109 | 11            | 213         | 37                | 1.6        |
| <b>Frr</b>                                                    | Ribosome recycling factor                                                                    |                     | 5.63 | 21.7     | TevJSym_ba00160                    | 0.070 | 9             | 250         | 41                | Rifp1Sym_aj00220                  | 0.120 | 13            | 313         | 62                | 1.7        |
| <b>GreA</b>                                                   | Transcription elongation factor GreA                                                         |                     | 4.86 | 17.3     | TevJSym_ap00690                    | 0.101 | 13            | 337         | 89                | Rifp1Sym_bi00120                  | 0.331 | 16            | 427         | 89                | 3.3        |

Table S4 - Comparison of intracellular soluble proteins

| Protein     | Function                                  | E.C.     | pI   | MW (kDa) | <i>Tevnia jerichonana</i> symbiont |       |               |             |                   | <i>Riftia pachytila</i> symbiont |       |               |             |                   | Spot ratio |
|-------------|-------------------------------------------|----------|------|----------|------------------------------------|-------|---------------|-------------|-------------------|----------------------------------|-------|---------------|-------------|-------------------|------------|
|             |                                           |          |      |          | Accession number                   | %Vol  | Peptide count | Mowse score | Sequence coverage | Accession number                 | %Vol  | Peptide count | Mowse score | Sequence coverage |            |
| <b>NusA</b> | Transcription elongation factor NusA      |          | 4.40 | 54.9     | TevJSym_ap00460                    | 0.116 | 25            | 485         | 50                | Rifp1Sym_cy00040                 | 0.170 | 24            | 428         | 49                | 1.5        |
| <b>NusG</b> | Transcription antitermination factor NusG |          | 5.25 | 20.1     | TevJSym_bu00100                    | 0.065 | 11            | 359         | 58                | Rifp1Sym_di00110                 | 0.174 | 14            | 449         | 72                | 2.7        |
| <b>PyrF</b> | Orotidine 5'-phosphate decarboxylase      | 4.1.1.23 | 5.89 | 26.4     | TevJSym_ac01140                    | 0.039 | 15            | 444         | 70                | Rifp1Sym_da00120                 | 0.110 | 7             | 518         | 35                | 2.8        |
| <b>RplI</b> | Putative 50S ribosomal protein L9         |          | 5.17 | 16.3     | TevJSym_ac00870                    | 0.116 | 14            | 465         | 82                | Rifp1Sym_cx00050                 | 0.413 | 13            | 481         | 71                | 3.6        |
| <b>Ssb</b>  | Single-stranded DNA-binding protein       |          | 5.19 | 16.3     | TevJSym_aa00340                    | 0.057 | 9             | 153         | 62                | Rifp1Sym_bd00110                 | 0.307 | 13            | 211         | 71                | 5.4        |
